# Supplementary material for: Caregiver’s readiness for change as a predictor of outcome and attendance in an intervention programme for children and adolescents with obesity: a secondary data analysis
Source: PubMed Central journal article supplement — BMJ Open. 2019 Mar 27;9(3):e023195. doi: 10.1136/bmjopen-2018-023195 (PMC6475337; doi:10.1136/bmjopen-2018-023195), 2019-03-27
Supplement: bmjopen-2018-023195.draft_revisions.pdf [file bmjopen-2018-023195.draft_revisions.pdf]

# BMJ Open

BMJ Open is committed to open peer review. As part of this commitment we make the peer review history of every article we publish publicly available.

When an article is published we post the peer reviewers' comments and the authors' responses online. We also post the versions of the paper that were used during peer review. These are the versions that the peer review comments apply to.

The versions of the paper that follow are the versions that were submitted during the peer review process. They are not the versions of record or the final published versions. They should not be cited or distributed as the published version of this manuscript.

BMJ Open is an open access journal and the full, final, typeset and author-corrected version of record of the manuscript is available on our site with no access controls, subscription charges or pay-per-view fees (<http://bmjopen.bmj.com>).

If you have any questions on BMJ Open's open peer review process please email [info.bmjopen@bmj.com](mailto:info.bmjopen@bmj.com)

# BMJ Open

## Caregiver's readiness for change as a predictor of outcome and attendance in an intervention programme for children and adolescents with obesity: a secondary data analysis.

|                               |                                                                                                                                                                                                                                                                                                                                                                                                                                                                                                                                                                                                                                                                                                                                                                                                   |
|-------------------------------|---------------------------------------------------------------------------------------------------------------------------------------------------------------------------------------------------------------------------------------------------------------------------------------------------------------------------------------------------------------------------------------------------------------------------------------------------------------------------------------------------------------------------------------------------------------------------------------------------------------------------------------------------------------------------------------------------------------------------------------------------------------------------------------------------|
| Journal:                      | <i>BMJ Open</i>                                                                                                                                                                                                                                                                                                                                                                                                                                                                                                                                                                                                                                                                                                                                                                                   |
| Manuscript ID                 | bmjopen-2018-023195                                                                                                                                                                                                                                                                                                                                                                                                                                                                                                                                                                                                                                                                                                                                                                               |
| Article Type:                 | Research                                                                                                                                                                                                                                                                                                                                                                                                                                                                                                                                                                                                                                                                                                                                                                                          |
| Date Submitted by the Author: | 26-Mar-2018                                                                                                                                                                                                                                                                                                                                                                                                                                                                                                                                                                                                                                                                                                                                                                                       |
| Complete List of Authors:     | Anderson, Yvonne; Taranaki District Health Board, Department of Paediatrics; University of Auckland Liggins Institute, Paediatric Endocrinology<br>Dolan, Gerard; Taranaki District Health Board<br>Wynter, Lisa; Taranaki District Health Board, Department of Paediatrics<br>Treves, Katharine; Taranaki District Health Board, Department of Paediatrics<br>Wouldes, Trecia; The University of Auckland, Psychological Medicine<br>Grant, Cameron; University of Auckland, Paediatrics<br>Cave, Tami; University of Auckland Liggins Institute<br>Smiley, Anna; University of Auckland Liggins Institute<br>Derraik, José; University of Auckland, Liggins Institute<br>Cutfield, Wayne; University of Auckland, Liggins Institute; Liggins, Institute<br>Hofman, Paul; University of Auckland |
| Keywords:                     | General Paediatrics, Pediatric obesity, Program evaluation, Health Behavior, Childhood obesity intervention, Readiness for change                                                                                                                                                                                                                                                                                                                                                                                                                                                                                                                                                                                                                                                                 |
|                               |                                                                                                                                                                                                                                                                                                                                                                                                                                                                                                                                                                                                                                                                                                                                                                                                   |

SCHOLARONE™  
Manuscripts

1  
2  
3 **Caregiver's readiness for change as a predictor of outcome and attendance in an**  
4 **intervention programme for children and adolescents with obesity: a secondary**  
5 **data analysis.**  
6  
7  
8  
9

10  
11 **Authors:** Yvonne C Anderson,<sup>1,2</sup> Gerard M S Dolan,<sup>3</sup> Lisa E Wynter,<sup>1</sup> Katharine F  
12 Treves,<sup>1</sup> Trecia A Wouldes,<sup>4</sup> Cameron C Grant,<sup>5,6,7</sup> Tami L Cave,<sup>2</sup> Anna J Smiley,<sup>2</sup>  
13 José G B Derraik,<sup>2,8</sup> Wayne S Cutfield,<sup>2,6,8</sup> Paul L Hofman.<sup>2,6</sup>  
14  
15

16  
17  
18 **Affiliation:**  
19

20 <sup>1</sup> Department of Paediatrics, Taranaki District Health Board, New Plymouth, New  
21 Zealand.  
22

23  
24 <sup>2</sup> Liggins Institute, University of Auckland, Auckland, New Zealand.  
25

26  
27 <sup>3</sup> Taranaki District Health Board, New Plymouth, New Zealand.  
28

29 <sup>4</sup> Faculty of Medical and Health Sciences, University of Auckland, Auckland, New  
30 Zealand.  
31

32  
33 <sup>5</sup> Department of Paediatrics, Child and Youth Health, University of Auckland,  
34 Auckland, New Zealand.  
35

36  
37 <sup>6</sup> Starship Children's Hospital, Auckland District Health Board, Auckland, New  
38 Zealand.  
39

40  
41 <sup>7</sup> Centre for Longitudinal Research - He Ara ki Mua, University of Auckland,  
42 Auckland, New Zealand.  
43

44  
45 <sup>8</sup> A Better Start – National Science Challenge, University of Auckland, Auckland,  
46 New Zealand.  
47  
48

49  
50 **Keywords:** General Paediatrics, Pediatric obesity, Program evaluation, Health  
51 Behavior, Childhood obesity intervention, Readiness for change  
52  
53  
54  
55  
56  
57  
58

1  
2  
3 **Running title:** Caregiver's readiness for change does not predict obesity intervention  
4  
5 outcome

6  
7 **Contact info:** Yvonne Anderson, Department of Paediatrics, Taranaki Base Hospital,  
8  
9 David Street, New Plymouth 4310. [yvonne.anderson@tdhb.org.nz](mailto:yvonne.anderson@tdhb.org.nz), +00647536139

10  
11 **Word count:** 3233

12  
13 **Clinical Trial Registration:** Australian New Zealand Clinical Trials Registry  
14  
15 (ANZCTR: 12611000862943)

## Abstract

**Objective/design:** It remains unclear as to the efficacy of readiness for change (RFC) measurements in child and adolescent obesity intervention programmes. This observational study aimed to determine whether the accompanying family member's stage of change (SOC) could predict outcome and adherence to treatment in an intensive intervention programme for children and adolescents with obesity.

**Setting:** Participants were from the Whānau Pakari randomised clinical trial, a community based multi-disciplinary intervention programme in Taranaki, New Zealand.

**Participants:** Eligible participants (recruited January 2012 to August 2014) were aged five to 16 years, and had a body mass index (BMI)  $\geq 98^{\text{th}}$  centile or BMI  $> 91^{\text{st}}$  centile with weight-related comorbidities.

**Interventions:** This study only assessed participants randomised to the high-intensity intervention programme (6-monthly assessments with weekly group sessions for 12 months) given attendance data were required (n=96).

**Primary and secondary outcome measures:** Primary trial outcome was BMI standard deviation score (SDS). At baseline assessment, participants (if  $> 11$  years old) and their accompanying adult were assessed for readiness to make healthy lifestyle change.

**Results:** Regression analyses showed that a quantitative measure of SOC in accompanying adults was not a predictor of primary (change in BMI SDS precontemplation/contemplation -0.08, 95% CI -0.18, 0.03, action -0.16, 95% CI -0.27, -0.05,  $p=0.27$ ) or secondary outcomes, or overall attendance in the weekly activity sessions ( $p=0.55$ ) in the child or adolescent. The quantitative questionnaires

1  
2  
3 showed a Cronbach's alpha of 0.62 child/adolescent and 0.65 accompanying adult  
4  
5 respectively.

6  
7 **Conclusions:** SOC was not a predictor of success in this multi-disciplinary  
8  
9 intervention programme for children and adolescents with obesity. Future research  
10  
11 needs to determine participants' factors for success.  
12  
13

14  
15  
16  
17  
18  
19  
20 **Strengths and limitations of this study:**

- 21  
22 • Utilisation of both qualitative and quantitative assessments to assess readiness  
23 for change.  
24  
25  
26 • High representation from indigenous populations and those from the most  
27 deprived households allowed for robust analysis in terms of ethnicity and  
28 deprivation.  
29  
30  
31 • Analysis of readiness for change as a dichotomous and continuous variable.  
32  
33  
34 • The assessment tool has not been used previously, and sample size was also  
35 relatively small. It is possible that the study was underpowered to detect an  
36 association between the two groups.  
37  
38  
39 • Preparation and action groups were merged as both were offered intervention in  
40 clinical practice. However, it could be argued that these stages of change should  
41 not be merged.  
42  
43  
44  
45  
46  
47  
48  
49  
50  
51  
52  
53  
54  
55  
56  
57  
58  
59  
60

## Introduction

Assessing a participant's psychological "readiness" to make lifestyle change is part of any consultation in clinical practice regarding changes in health. However this is an ill-defined process, and usually qualitative in nature. Historically, readiness for change (RFC) has been utilised qualitatively in some obesity services. It is a concept that has developed from the transtheoretical model defining stages of behavioural change around addiction.[1] When deciding to undertake behavioural change, an individual moves through defined stages at different rates and not always in a linear fashion. *Pre-contemplation* is the stage where an individual can be described as feeling they "do not have a problem". *Contemplation* is when the individual acknowledges they "may have a problem". *Preparation* – the individual acknowledges they "may have a problem and need to do something". *Action* – "I will try these changes". *Maintenance* - "The changes I have made are now part of what I do".[1]

The transtheoretical model has been used to assess individual's motivation for smoking cessation.[2] Various tools based on the original RFC questionnaire directed towards excessive alcohol use have been trialled in the obesity setting.[3-5] However, the utility of RFC for obesity services remains unclear, and it is too simplistic to expect that every individual would move through these stages in a similar fashion. Little has been reported about the efficacy of RFC assessment in relation to outcome in children/adolescents with obesity, and whether an individual's readiness in the 'snapshot' situation of an assessment translates to persistent motivation to make lifestyle change over time. However, previous studies have highlighted the importance of tailoring interventions to the individual stage of change (SOC) rather

1  
2  
3 than treating all participants as if they are in preparation or action stages.[4] A  
4  
5 Brazilian study of children and adolescents aged 10 to 18 years found that baseline  
6  
7 SOC was associated with anthropometric outcomes after a short (16-week)  
8  
9 intervention for weight (maintenance stage of change being favourable).[6]  
10  
11 Nonetheless, there was no association between adolescents' adherence to treatment  
12  
13 and their baseline SOC. Past international clinical practice guidelines and reviews  
14  
15 have recommended the importance of health care professionals assessing readiness  
16  
17 and barriers to change prior to implementing any healthy lifestyle plan for weight  
18  
19 management.[7-9]  
20  
21  
22  
23

24 A parent's readiness is a key factor in a child or adolescent's success in making and  
25  
26 maintaining lifestyle changes. Factors associated with being at a greater degree of  
27  
28 RFC in one study were having a child that was overweight, or older ( $\geq 8$  years) child,  
29  
30 believing their own weight or their child's weight was above average, and perceiving  
31  
32 that their child's weight was a health problem.[5] Parental confidence in their ability  
33  
34 to do well in a treatment programme was cited as the strongest predictor of treatment  
35  
36 completion and early treatment response in an Iceland study of an 18-week  
37  
38 intervention for 7.5- to 13.6-year-old children.[10] Importantly however, this variable  
39  
40 was not associated with child outcome at 1-year follow-up. Parental recognition of  
41  
42 child overweight has been found to be a predictor of behavioural intentions, but these  
43  
44 intentions are not always translated into behaviours.[11] A high parental readiness  
45  
46 does not necessarily imply their readiness to engage in lifestyle interventions for their  
47  
48 child affected by overweight/obesity.[12]  
49  
50  
51  
52  
53  
54  
55  
56  
57  
58  
59  
60



1  
2  
3 A recent systematic review of barriers and facilitators to initial (and continued)  
4 attendance in childhood weight management programmes for primary school-aged  
5 children found that parents provide the motivation for programme initiation, largely  
6 driven by their concern for their child's psychological health and wellbeing.[13] Non-  
7 modifiable predictors of initial and continued attendance included gender  
8 (programmes favoured females), ethnicity (favoured ethnic majority), family structure  
9 (favoured two-parent families), and socioeconomic background (favoured lower level  
10 of deprivation).[13] Body mass index (BMI) or age at entry were not associated with  
11 attendance. In the New Zealand context, engagement for Pacific Island  
12 parents/caregivers in a weight-management programme was attractive when it was  
13 family-based - providing support for each other, highlighting the importance of  
14 recognising cultural appropriateness in programmes.[14] Moreover, parents can be in  
15 differing stages of change for varying aspects of healthy lifestyle change; one study  
16 demonstrated different parental stages of change for modification of their children's  
17 dietary versus physical activity behaviours.[15]

18  
19  
20  
21  
22  
23  
24  
25  
26  
27  
28  
29  
30  
31  
32  
33  
34  
35  
36  
37  
38 Clinician assessment of SOC is usually qualitative. However, if a quantitative tool  
39 could determine the likelihood of healthy lifestyle change at initial assessment, this  
40 would potentially allow prioritisation of health resources where they are most likely  
41 to lead to positive outcomes.[16] Given the complexity of behaviour change as it  
42 relates to obesity, the original RFC questionnaire[3] would require modification and  
43 expansion to include questions regarding eating behaviour, attitude towards weight,  
44 and physical activity behaviour. Confidence to make changes in physical activity and  
45 eating behaviour would also need consideration.  
46  
47  
48  
49  
50  
51  
52  
53  
54  
55  
56  
57  
58  
59  
60

1  
2  
3 A previous audit of a healthy lifestyle initiative in New Zealand (NZ) found there was  
4 a need to assess SOC of families prior to programme commencement, as it was not  
5 uncommon for the coordinator to visit an empty house, impacting on the use of  
6 valuable resource.[17] A new model was created, which incorporated assessment of  
7 readiness to make healthy lifestyle change.[16] The service, created and named  
8 'Whānau Pakari', is a multi-disciplinary intervention programme for  
9 children/adolescents with obesity, with a randomised clinical trial (RCT) embedded  
10 within the service to assess outcomes.[16] The results of the RCT showed a mean  
11 change in body mass index (BMI) standard deviation score (SDS) at 12-months from  
12 baseline of -0.12 in the low intensity control group (6-monthly assessments and  
13 advice), and -0.10 in the high intensity intervention group (weekly group sessions  
14 with 6-monthly assessments and advice).[18] However, if  $\geq 70\%$  attendance was  
15 achieved in the high intensity intervention, the effect was doubled (-0.22 SDS).[18]  
16 Baseline SOC in the accompanying adult in both groups was not different (control  
17 group: preparation/action (n=54, 56%), vs. precontemplation/contemplation (n=43,  
18 44%); intervention group: preparation/action (n=43; 43%) vs.  
19 precontemplation/contemplation (n=57; 57%); p=0.075).  
20  
21  
22  
23  
24  
25  
26  
27  
28  
29  
30  
31  
32  
33  
34  
35  
36  
37  
38  
39  
40  
41

42 The purpose of this study was twofold: first, to investigate whether the accompanying  
43 family member's stage of change (SOC) at baseline using a standardised measure of  
44 RFC[3] (adapted to focus on attitudes towards eating habits, weight and physical  
45 activity) predicted our primary outcome (BMI SDS) and/or the secondary outcomes in  
46 the Whānau Pakari 12-month intervention; and second, to determine whether SOC  
47 was predictive of adherence to treatment. It was hypothesised that those  
48 accompanying family member's expressing a higher SOC (i.e. preparation and action)  
49  
50  
51  
52  
53  
54  
55  
56  
57  
58  
59  
60

1  
2  
3 would see greater improvements in their children/adolescents in terms of primary and  
4  
5 secondary outcomes, and demonstrate greater programme adherence.  
6  
7

## 8 9 **Methods**

### 10 11 *Participants*

12  
13 Taranaki has a population of approximately 23,139 children aged 0-15 years, of  
14  
15 whom 81% identify as NZ European (NZE), 28% as Māori, and 1% as other ethnicity  
16  
17 (multiple ethnicities possible).[19] Eligible participants (recruited January 2012 to  
18  
19 August 2014 as part of the Whānau Pakari trial) were aged five to 16 years, and had a  
20  
21 BMI  $\geq 98^{\text{th}}$  centile or BMI  $> 91^{\text{st}}$  centile with weight-related comorbidities.[20] BMI  
22  
23 percentile and BMI SDS were calculated as per UK Cole normative data, using the  
24  
25 KIGS auxology software (Pfizer Endocrine Care TM).[21] One aspect of eligibility  
26  
27 was being pre-contemplative or above on the RFC scoring. We purposely set the bar  
28  
29 low (i.e. below the pre-contemplative level) to assess whether degree of RFC predicts  
30  
31 outcome;[16] only those classed as not ready for change on SOC assessment were  
32  
33 excluded.  
34  
35  
36  
37  
38

39  
40 The rationale and study design for the Whānau Pakari trial have been previously  
41  
42 reported, as have 12-month outcomes.[16, 18] In brief, the RCT compared a 12-  
43  
44 month intensive intervention with assessments and weekly activity sessions with a  
45  
46 minimal intensity control with assessments only, including 6-monthly follow-up,  
47  
48 conducted in Taranaki, NZ. For the purposes of the study, given we were interested in  
49  
50 SOC in relation to outcome, only participants in the intensive intervention arm were  
51  
52 included.  
53  
54  
55  
56  
57  
58  
59  
60

### *Assessments*

Whānau Pakari was a novel home-based ‘demedicalised’ model (no hospital visits, with a comprehensive weight-related medical assessment in the home) that was family-centred. The assessment included dietary, physical and psychological review, with evaluation of SOC. Secondary outcomes included waist circumference, number of breakfasts eaten per week; servings of fruit and vegetables per day; consumption of sweet drinks per day (ml); 550-m walk/run time (minutes);[22] actual steps per day and actual time spent on moderate-intensity to very vigorous physical activity per day – measured using accelerometers (ActiGraph wGT3X-BT; Actigraph LLC, Pensacola, Florida, USA); total reported activity per day (minutes); reported screen time per day (minutes); total generic scaled score (child); total generic scaled score (parent) – both from Pediatric Quality of Life (PedsQL)<sup>TM</sup> questionnaire;[23] Achenbach Child Behavior Checklist (CBCL) internalising, externalising and total raw scores;[24] as well as glycated haemoglobin (HbA1c) and fasting insulin (pmol/L).

At the end of the baseline assessment, two assessments of RFC were undertaken. The healthy lifestyle coordinator’s qualitative judgement of SOC, ranked pre-contemplation, contemplation, and preparation/action for child (if >11 years of age) and committed family member was recorded first. The trial-designed questionnaire was completed by the child (if >11 years of age) and another version of the questionnaire for the family member (in every participant). For comparative analysis, preparation was merged with action, resulting in three possible stages of change. This was a pragmatic decision based on clinical grounds; if SOC was found to be a predictor of outcome, a family that demonstrated preparation or action ratings for

1  
2  
3 SOC would be likely to be offered a place in the intensive intervention in the “real-  
4 world”, fiscally constrained setting outside of an RCT; whereas those that were pre-  
5 contemplative or contemplative were more likely to be offered motivational  
6 interviewing, and a follow-up assessment at a later date.  
7  
8  
9  
10

#### 11 12 13 *RFC as a dichotomous measure*

14  
15 The RFC questionnaire was based on Rollnick et al.’s original readiness to change  
16 questionnaire,[3] which we modified to focus on beliefs around weight, eating habits,  
17 and physical activity levels. A 5-point Likert scale was used. Given the complexity of  
18 obesity, additional questions were added to the original questionnaire, resulting in a  
19 21-item child/adolescent questionnaire and a 27-item questionnaire for the family  
20 member, with 6 extra questions related to attitudes/behaviour of the wider family unit.  
21  
22 The questionnaire was tested for understanding and comprehension in a randomly  
23 selected cohort of clinic patients prior to trial commencement, who were underweight,  
24 normal weight, and overweight. This pilot testing found the questionnaire was  
25 acceptable for use (i.e. underweight children were scored pre-contemplative).  
26  
27  
28  
29  
30  
31  
32  
33  
34  
35  
36  
37  
38  
39

40 Questions were reverse keyed in their language to negate the need to reverse the pre-  
41 contemplative scaled score when comparing the three scores for each SOC with each  
42 other. Scoring was undertaken, which calculated the sum totals for each SOC (pre-  
43 contemplation, contemplation or preparation/action), divided by the number of  
44 questions asked to obtain an adjusted score for each SOC. The highest adjusted score  
45 was then designated as the SOC of the child/adolescent or family member. If there  
46 were two equal scores, the stage furthest along the scale was taken as the designated  
47 SOC as per the original RFC questionnaire.[3]  
48  
49  
50  
51  
52  
53  
54  
55  
56  
57  
58  
59  
60

### *RFC as a continuous variable*

For RFC, we undertook analysis both assigning a SOC as per the Prochaska and DiClemente Stages of Change Model,[2] and also utilising the scores as a continuous RFC variable for the family member questionnaire.[25] The same model for obtaining the continuous score has been previously used.[26] The scores were then summed for each subscale.

### *Attendance*

Attendance was calculated as a percentage based on the number of weekly activity sessions offered to each individual family over the 12-month period of their involvement in the programme.

### *Ethics*

Ethics approval for the trial was granted by the Central Health and Disability Ethics Committee (NZ) (CEN/11/09/054). Written and verbal informed consents were obtained from all participants or their guardians. Trial registration was with the Australian NZ Clinical Trials Registry (ANZCTR: 12611000862943).

### *Data analyses*

Cronbach's alpha was used to establish the reliability of the quantitative RFC questionnaire. The agreement between qualitative and quantitative assessments was examined using Spearman's rank ( $\rho$ ) and Kendall's ( $\tau$ ) correlation coefficients. Generalised linear regression models were used to compare study outcomes (as described above and in Table 2) in the children according to the family member's

SOC (pre-contemplation/contemplation vs preparation/action). Models were adjusted for child/adolescent's ethnicity, gender, age at assessment, level of socioeconomic deprivation, as well as the respective parameter at baseline. Statistical analyses were performed in Minitab v.16 (Pennsylvania State University, State College, PA, USA) and SAS v9.4 (SAS Institute, Cary, NC, USA). All statistical tests were two-tailed with a significance level maintained at  $p < 0.05$ .

## Results

A total of 102 participants were randomised to the intense intervention arm. The flow of participants through the trial has been previously reported.[18] Two participants were excluded after randomisation; due to new medical diagnoses likely to affect weight status. Of the remaining 100, one participant relocated, never attending a session, and three had longer attendance than offered in the intervention, leaving 96 participants with complete attendance data. Table 1 shows the baseline characteristics of the participants.

**Table 1.** Baseline characteristics of the 96 intervention participants with complete attendance data. Age and body mass index (BMI) data are means and standard deviations.

|                                     |                          | Intervention |
|-------------------------------------|--------------------------|--------------|
| <b>n</b>                            |                          | 96           |
| <b>Age (years)</b>                  |                          | 10.7 (3.07)  |
| <b>Sex ratio females (n, %)</b>     |                          | 48 (50.0%)   |
| <b>Ethnicity (n, %)<sup>†</sup></b> | Māori                    | 45 (46.9%)   |
|                                     | New Zealand European     | 40 (41.7%)   |
|                                     | Other                    | 11 (11.5%)   |
| <b>Anthropometry</b>                | BMI (kg/m <sup>2</sup> ) | 29.6 (6.11)  |
|                                     | BMI SDS                  | 3.11 (0.59)  |

|                                                 |                                                |             |
|-------------------------------------------------|------------------------------------------------|-------------|
| <b>Deprivation index (quintile)<sup>‡</sup></b> | 1 (least deprived)                             | 14 (14.6%)  |
|                                                 | 2                                              | 19 (19.8%)  |
|                                                 | 3                                              | 17 (17.7%)  |
|                                                 | 4                                              | 22 (22.9%)  |
|                                                 | 5 (most deprived)                              | 24 (25%)    |
| <b>Accompanying adult</b>                       | Mother                                         | 74 (77.1%)  |
|                                                 | BMI (kg/m <sup>2</sup> ) <sup>§</sup>          | 32.6 (7.26) |
|                                                 | BMI ≥30 kg/m <sup>2</sup> (obese) <sup>§</sup> | 56 (61.5%)  |
| <b>Living arrangements<sup>¶</sup></b>          | Two-parent household                           | 52 (55.9%)  |
|                                                 | One-parent household                           | 37 (39.8%)  |
|                                                 | Other                                          | 4 (4.3%)    |

Abbreviations: BMI, body mass index.

<sup>†</sup>Prioritised ethnic group.

<sup>‡</sup>Quintiles of level of household deprivation based on the NZ Deprivation Index 2006.[27]

<sup>§</sup>Parameter was measured where consented to (n=91), otherwise not included.

<sup>¶</sup>n=93.

### *Reliability*

Reliability of the RFC questionnaire (family member and child/adolescent) using Cronbach's alpha was 0.62 for the child/adolescent questionnaire, and 0.65 for family member questionnaire.

Statistically, there was no evidence of an agreement found between the family member's and child/adolescent's questionnaires as per Kendall's correlation coefficient ( $\tau=0.60$ ;  $p=0.11$ ). However, scores from the family member's questionnaire and qualitative assessment were positively correlated ( $\rho=0.28$ ;  $p=0.005$ ) and showed moderate agreement ( $\tau=0.64$ ;  $p=0.033$ ). Similarly, the child/adolescent's questionnaire and qualitative assessment scores were also correlated ( $\rho=0.38$ ;  $p=0.012$ ), with some evidence of moderate agreement ( $\tau=0.69$ ;  $p=0.051$ ).

### *Attendance*



Median attendance at the weekly activity sessions was 35% (IQR 66%). The quantitative RFC questionnaire for the family member was used for all analyses of outcome, as these were available for the entire cohort. In multivariate analyses, there was no association between quantitative SOC of the family member and attendance overall in the intervention (n=96, p=0.55).

For the qualitative assessment of RFC of the family member, overall attendance was greater for the pre-contemplation/contemplation group than in the preparation/action group (49.6% vs. 36.5%; p=0.009). In addition, the greater the level of household deprivation, the lower the attendance at the intervention overall (p=0.004), while mean attendance was greater among NZ Europeans compared to non-Europeans (49.5% vs. 36.6%; p=0.003). Further analyses were based on the quantitative measure of RFC.

### *Outcome*

Of the 96 participants, 68 had attendance data and assessment data at 12 months.

Table 2 shows association of quantitative SOC (family member) at baseline assessment and outcome at 12 months.

**Table 2.** Change at 12 months from baseline in association with the quantitative stage of change of committed family member at baseline (Pre-contemplation/Contemplation vs. Preparation/Action)

|                        | Pre-contemplation/<br>Contemplation* | Preparation/Action   | P-<br>value <sup>‡</sup> |
|------------------------|--------------------------------------|----------------------|--------------------------|
| N                      | 36                                   | 32                   |                          |
| <b>Primary outcome</b> |                                      |                      |                          |
| BMI SDS                | -0.08 (-0.18, 0.03)                  | -0.16 (-0.27, -0.05) | 0.27                     |

**Secondary outcomes**

|                                                                                |                      |                      |      |
|--------------------------------------------------------------------------------|----------------------|----------------------|------|
| Waist circumference (cm)                                                       | 2.7 (0.9, 4.6)       | 1.5 (-0.54, 3.45)    | 0.36 |
| Number of breakfasts eaten                                                     | 0.1 (-0.4, 0.7)      | 0.2 (-0.5, 0.8)      | 0.95 |
| Servings fruit/vegetables per day                                              | 1.2 (0.6, 1.8)       | 0.7 (0.03, 1.3)      | 0.24 |
| Sweet drinks per day (ml)                                                      | -126 (-191, -62)     | -191 (-261, -121)    | 0.20 |
| 550-m walk/run time (minutes)                                                  | -0.46 (-0.65, -0.27) | -0.49 (-0.69, -0.29) | 0.84 |
| Actual steps per day                                                           | -403 (-1319, 513)    | 203 (-890, 1296)     | 0.41 |
| Actual moderate-intensity to very vigorous physical activity per day (minutes) | -9.0 (-17.6, -0.3)   | 7.2 (-3.1, 17.5)     | 0.03 |
| Total reported activity per day (minutes)                                      | 19.9 (-7.8, 47.5)    | 24.7 (-5.5, 54.9)    | 0.82 |
| Reported screen time per day (minutes)                                         | -21.1 (-53.2, 10.9)  | -16.8 (-51.4, 17.8)  | 0.86 |
| Total generic scaled score – child                                             | 7.4 (3.0, 11.8)      | 8.0 (3.2, 12.7)      | 0.87 |
| Total generic scaled score – parent                                            | 7.7 (1.8, 13.5)      | 9.2 (2.8, 15.6)      | 0.74 |
| CBCL internalising raw score                                                   | -3.4 (-5.6, -1.2)    | -3.2 (-5.5, -0.8)    | 0.89 |
| CBCL externalising raw score                                                   | -2.0 (-4.3, 0.3)     | -3.1 (-5.6, -0.6)    | 0.52 |
| CBCL total raw score                                                           | -8.5 (-14.9, -4.8)   | -11.7 (-18.5, -4.8)  | 0.52 |
| HbA1c (mmol/mol) <sup>§</sup>                                                  | -0.29 (-1.69, 1.10)  | -0.80 (-2.25, 0.66)  | 0.63 |
| Fasting insulin (pmol/L) <sup>¶</sup>                                          | 7.4 (-24.4, 39.1)    | -9.45 (-42.4, 23.5)  | 0.48 |

\*Data are means and 95% confidence intervals adjusted for child/adolescent's ethnicity, gender, level of deprivation, age at assessment and the respective parameter at baseline.

<sup>‡</sup>P-value for a difference in change from baseline between pre-contemplation/contemplation and action groups.

<sup>§</sup>n=51.

<sup>¶</sup>n=56.

The family member's SOC was not associated with the child/adolescent's ethnicity (p=0.54), gender (p=0.71), level of household deprivation (p=0.88), or age at assessment (p=0.10). This was also seen for the qualitative SOC in the family member (p=0.63; p=0.55; p=0.08; and p=0.59, respectively).

### *Readiness for change as a continuous measure*

Greater scores on RFC in the family member were not associated with changes in

1  
2  
3 primary outcome or with key secondary outcomes assessed (data not shown).  
4  
5

## 6 7 **Discussion**

8  
9 This study found that assessment of accompanying family member's SOC on  
10 quantitative assessment at baseline was not a predictor of primary or secondary  
11 outcomes, or overall adherence in a multi-disciplinary intervention programme for  
12 children and adolescents with obesity. This is important, given that attendance was  
13 found in the intensive intervention to have a doubling of effect in terms of BMI SDS  
14 reduction.[18] Deprivation and ethnicity did not affect SOC in the family member.  
15  
16  
17  
18  
19  
20  
21  
22  
23

24 It was not surprising that accompanying adult's stage of readiness to make lifestyle  
25 changes was not a good predictor of child/adolescent outcome. While readiness  
26 models have shown promise in child obesity pilot programmes,[28] it is clear that  
27 acknowledgement of child obesity as a problem by the individual and family  
28 members is essential for lifestyle change to occur.[5] Our findings are consistent with  
29 a previous Icelandic study, which found that parental confidence for doing well in  
30 treatment (18-week intervention) was not associated with child outcome at 1-year  
31 follow-up.[10] The SOC model is a snapshot in time, and does not necessarily  
32 represent future behaviour.[11]  
33  
34  
35  
36  
37  
38  
39  
40  
41  
42  
43  
44  
45

46 The actions of parents and their SOC are inherently linked to outcomes for a child; a  
47 study of 142 families found that changes in parental BMI SDS significantly predicted  
48 child's BMI SDS change at 0-6 and 0-24 months in a family-based intervention.[29]  
49 However, the situation is complex; a recent study showed that children whose parents  
50 perceive them to be overweight are more likely to have negative views about their  
51  
52  
53  
54  
55  
56  
57  
58  
59  
60

1  
2  
3 own body size, and are more likely to be trying to lose weight. In these children, a  
4 counterintuitive association between parents' perceptions of their children as being  
5 overweight, and subsequent weight gain in those children was found.[30] It was  
6 previously observed that several demographic factors and personal perceptions are  
7 associated with a parent's readiness to assist with their child's weight status.[5] These  
8 findings highlight that in any multi-disciplinary intervention programme, healthy  
9 lifestyle change needs to be the focus, rather than concepts of weight or obesity.  
10  
11  
12  
13  
14  
15  
16  
17  
18  
19

20 Theoretical weaknesses have been identified when treating RFC scoring as  
21 dichotomous variables; therefore a continuous RFC variable has been favoured.[3, 25]  
22 However, this approach did not alter our results.  
23  
24  
25  
26  
27  
28

29 Whilst the transtheoretical model based on RFC offers a comprehensive framework,  
30 assessment instruments, such as the URICA, the S-Weight/P-Weight, and the  
31 Decisional Balance Inventory (DBI) offer practical applications.[26] Review of these  
32 measures found the S-Weight/P-Weight to be the most efficient, providing SOC and  
33 the process of change an individual is using.[26] The S-Weight consists of 5 items  
34 assessing SOC, with the P-Weight having 34 items measuring four processes of  
35 change; emotional re-evaluation, weight management actions, environmental  
36 restructuring, and weight consequences evaluation.[26] These were created by  
37 international expert consensus.[31] However, to our knowledge, such instruments are  
38 not available for use in both parents and children.  
39  
40  
41  
42  
43  
44  
45  
46  
47  
48  
49  
50  
51

52 Strengths of this study include the use of both qualitative and quantitative assessments  
53 of RFC. Due to the high representation from indigenous populations and those from  
54  
55  
56  
57  
58  
59  
60

1  
2  
3 the most deprived households, robust analysis in terms of ethnicity and deprivation  
4 were possible. Limitations of this study include lack of measurement of self-efficacy,  
5 and overall confidence to make changes. Confidence in making changes in physical  
6 activity and eating behaviour were included in both quantitative questionnaires,  
7 however. The assessment tool has not been used previously, and sample size was also  
8 relatively small. It is possible that the study was underpowered to detect an  
9 association between the two groups. Whilst age may have an impact on attendance of  
10 children or adolescents in weight-management programmes, this programme required  
11 the attendance of an accompanying adult, irrespective of the age of the  
12 child/adolescent. Therefore, findings were not presented separately for varying ages  
13 in this cohort. It could be argued that preparation and action should not be merged for  
14 the purposes of analysis. However, as outlined previously, this was a decision based  
15 on how the outcomes would be used in clinical practice. To ensure this did not affect  
16 results, we undertook analysis of RFC as a continuous variable as well.  
17  
18  
19  
20  
21  
22  
23  
24  
25  
26  
27  
28  
29  
30  
31  
32  
33  
34

35 It had been hoped that, if the RFC measure was predictive of outcome success, then  
36 development of paired interventions around motivation for change for those in earlier  
37 stages of change, followed by direct interventions for those in later stages could  
38 achieve less programme dropout.[16] This would lead to a more efficient and cost  
39 effective utilisation of limited resource. However, this was not the case. Further  
40 development of a measure of RFC in this context is warranted.  
41  
42  
43  
44  
45  
46  
47  
48  
49

50 In conclusion, assessment of RFC in this multi-disciplinary intervention for  
51 children/adolescents with obesity was not a successful predictor of outcome or  
52 attendance. Whilst expert panels are recommending determination of a family's  
53  
54  
55  
56  
57  
58  
59  
60

1  
2  
3 readiness for change in the overall psychosocial assessment of a child with obesity,[9]  
4  
5 this process remains ill defined. Future research needs to determine participants'  
6  
7 factors for success in making healthy lifestyle changes.  
8  
9

10  
11 **Funding:** This work was supported by grants from the Health Research Council of  
12  
13 NZ, Royal Australasian College of Physicians, Maurice and Phyllis Paykel Trust,  
14  
15 Taranaki Medical Foundation, and Lotteries Health Research.  
16  
17

18  
19 **Competing Interests Statement:** Dr. Anderson reports grants from Health Research  
20  
21 Council of NZ, grants from Royal Australasian College of Physicians, grants from  
22  
23 Maurice and Phyllis Paykel Trust, grants from Taranaki Medical Foundation during  
24  
25 the conduct of the study; Ms. Cave and Ms. Smiley report grants from Taranaki  
26  
27 Medical Foundation, grants from Maurice and Phyllis Paykel Trust, grants from  
28  
29 Lotteries Health Research during the conduct of the study; Dr. Hofman reports grants  
30  
31 from Lotteries Health Research during the conduct of the study; Dr. Dolan, Ms.  
32  
33 Wynter, Dr. Treves, Dr. Wouldes, Dr. Grant, Dr. Derraik, and Dr. Cutfield have  
34  
35 nothing to disclose.  
36  
37  
38  
39  
40

41 **Author's Contributions:**

42  
43 YCA designed the study, coordinated the trial, provided paediatrician oversight,  
44  
45 drafted the initial manuscript, and approved the final manuscript as submitted. GMSD  
46  
47 created the trial-designed readiness for change quantitative assessment tool. LEW  
48  
49 recruited participants and undertook assessments and data entry. KFT provided  
50  
51 psychologist oversight and analysis of patient data. TAW assisted with study design,  
52  
53 and reliability/validity of the questionnaires. CCG is secondary supervisor for the  
54  
55  
56  
57  
58  
59  
60

1  
2  
3 research team, and assisted with study design. TLC supervised data entry and  
4 cleaning. AJS assisted with data entry and attendance data. JGBD undertook data  
5 analysis. WSC contributed to study design. PLH contributed to study design, and  
6 supervised the research team. All authors contributed to discussions and critically  
7 appraised the manuscript. All authors approved the final manuscript as submitted and  
8 agree to be accountable for all aspects of the work.  
9  
10  
11  
12  
13  
14  
15  
16  
17

18 **Data sharing statement:** Anonymised and deidentified data will be made available  
19 to other investigators upon request. Interested readers should contact the senior  
20 author PH (p.hofman@auckland.ac.nz) to obtain the data.  
21  
22  
23  
24  
25  
26  
27  
28  
29  
30  
31  
32  
33  
34  
35  
36  
37  
38  
39  
40  
41  
42  
43  
44  
45  
46  
47  
48  
49  
50  
51  
52  
53  
54  
55  
56  
57  
58  
59  
60

## References

1 Prochaska JO, DiClemente CC. Transtheoretical therapy: Toward a more integrative model of change. *Psychotherapy: Theory, Research & Practice* 1982;19:276-88.

2 DiClemente CC, Prochaska JO. Self-change and therapy change of smoking behavior: a comparison of processes of change in cessation and maintenance. *Addict Behav* 1982;7:133-42.

3 Rollnick S, Heather N, Gold R, et al. Development of a short "readiness to change" questionnaire for use in brief, opportunistic interventions among excessive drinkers. *Br J Addict* 1992;87:743-54. <http://pediatrics.aappublications.org/content/116/1/e94> (accessed 02/12/17).

4 Hoke M, Timmerman G. Transtheoretical Model: potential usefulness with overweight rural Mexican American women. *Hisp Health Care Int* 2011;9:41-9 doi:10.1891/1540-4153.9.1.41.

5 Rhee KE, De Lago CW, Arscott-Mills T, et al. Factors associated with parental readiness to make changes for overweight children. *Pediatrics* 2005;116:e94-e101.

6 da Silva DF, Bianchini JAA, Lopera CA, et al. Impact of readiness to change behavior on the effects of a multidisciplinary intervention in obese Brazilian children and adolescents. *Appetite* 2015;87:229-35 <https://dx.doi.org/10.1016/j.appet.2014.12.221>.

7 Lau DCW, Douketis JD, Morrison KM, et al. 2006 Canadian clinical practice guidelines on the management and prevention of obesity in adults and children [summary]. *CMAJ* 2007;176:S1-13 <https://dx.doi.org/10.1503/cmaj.061409>.

8 Krebs NF, Himes JH, Jacobson D, et al. Assessment of child and adolescent overweight and obesity. *Pediatrics* 2007;120:S193-228 <https://dx.doi.org/10.1542/peds.2007-2329D>.



- 1  
2  
3 9 Daniels SR, Jacobson MS, McCrindle BW, et al. American Heart Association Childhood  
4  
5 Obesity Research Summit: executive summary. *Circulation* 2009;119:2114-23  
6  
7 <https://dx.doi.org/10.1161/CIRCULATIONAHA.109.192215>.  
8  
9  
10 10 Gunnarsdottir T, Njardvik U, Olafsdottir AS, et al. The role of parental motivation in  
11  
12 family-based treatment for childhood obesity. *Obesity* 2011;19:1654-62  
13  
14 <https://dx.doi.org/10.1038/oby.2011.59>.  
15  
16  
17 11 Park MH, Falconer CL, Croker H, et al. Predictors of health-related behaviour change in  
18  
19 parents of overweight children in England. *Prev Med* 2014;62:20-4  
20  
21 <https://dx.doi.org/10.1016/j.ypmed.2014.02.002>.  
22  
23  
24 12 Giannisi F, Pervanidou P, Michalaki E, et al. Parental readiness to implement life-style  
25  
26 behaviour changes in relation to children's excess weight. *J Paediatr Child Health*  
27  
28 2014;50:476-81 <https://dx.doi.org/10.1111/jpc.12500>.  
29  
30  
31 13 Kelleher E, Davoren MP, Harrington JM, et al. Barriers and facilitators to initial and  
32  
33 continued attendance at community-based lifestyle programmes among families of  
34  
35 overweight and obese children: a systematic review. *Obes Rev* 2017;18:183-94  
36  
37 <https://dx.doi.org/10.1111/obr.12478>.  
38  
39  
40 14 Teevale T, Taufas S, Percival T. Acceptability and non-compliance in a family-led weight-  
41  
42 management programme for obese Pacific children. *Public Health Nutr* 2015;18:2625-33  
43  
44 <https://dx.doi.org/10.1017/S1368980014003255>.  
45  
46  
47 15 Rhee K, McEachern R, Jelalian E. Parent readiness to change differs for overweight child  
48  
49 dietary and physical activity behaviors. *J Acad Nutr Diet* 2014;114:1601-10  
50  
51 <https://dx.doi.org/10.1016/j.jand.2014.04.029>.  
52  
53  
54 16 Anderson YC, Wynter LE, Moller KR, et al. The effect of a multi-disciplinary obesity  
55  
56 intervention compared to usual practice in those ready to make lifestyle changes: design and  
57  
58

1  
2  
3 rationale of Whanau Pakari. *BMC Obes* 2015;2:41.

4 <https://bmcobes.biomedcentral.com/articles/10.1186/s40608-015-0068-y> (accessed  
5  
6 02/12/2017).

7  
8  
9  
10 17 Anderson YC, Taylor GM, Grant CC, et al. The Green Prescription Active Families  
11 programme in Taranaki, New Zealand 2007-2009 - did it reach children in need? *J Prim*  
12 *Health Care* 2015;7:192-7.

13  
14  
15  
16 18 Anderson YC, Wynter LE, Grant CC, et al. A novel home-based intervention for child and  
17 adolescent obesity: the results of Whānau Pakari randomised controlled trial. *Obesity*  
18 2017;25:1965-73.

19  
20  
21  
22 19 Census 2013: Ethnic group by age group and sex. Available at:  
23  
24 <http://nzdotstat.stats.govt.nz/wbos/Index.aspx?DataSetCode=TABLECODE8021#>. Accessed  
25  
26 November/18, 2014.

27  
28  
29  
30 20 Cole TJ. A chart to link child centiles of body mass index, weight and height. *Eur J Clin*  
31 *Nutr* 2002;56:1194-9.

32  
33  
34  
35 21 Freeman JV, Cole TJ, Chinn S, et al. Cross sectional stature and weight reference curves  
36 for the UK, 1990. *Arch Dis Child* 1995;73:17-24.

37  
38  
39  
40 22 Hamlin MJ, Fraser M, Lizamore CA, et al. Measurement of cardiorespiratory fitness in  
41 children from two commonly used field tests after accounting for body fatness and maturity. *J*  
42 *Hum Kinet* 2014;40:83-92.

43  
44  
45  
46 23 Varni JW, Burwinkle TM, Seid M, et al. The PedsQL 4.0 as a pediatric population health  
47 measure: feasibility, reliability, and validity. *Ambul Pediatr* 2003;3:329-41.

48  
49  
50  
51 24 Achenbach TM, Ruffle TM. The Child Behavior Checklist and related forms for assessing  
52 behavioral/emotional problems and competencies. *Pediatr Rev* 2000;21:265-71.

1  
2  
3 25 Forsberg L, Ekman S, Halldin J, et al. The Readiness to Change Questionnaire: Reliability  
4 and validity of a Swedish version and a comparison of scoring methods. *Br J Health Psychol*  
5 2004;9:335-46.  
6  
7

8  
9  
10 26 Ceccarini M, Borrello M, Pietrabissa G, et al. Assessing motivation and readiness to  
11 change for weight management and control: an in-depth evaluation of three sets of  
12 instruments. *Front Psychol* 2015;6:511 <https://dx.doi.org/10.3389/fpsyg.2015.00511>.  
13  
14  
15

16  
17 27 New Zealand Deprivation Index 2006. Available at: [https://koordinates.com/layer/1066-](https://koordinates.com/layer/1066-nz-deprivation-index-2006/)  
18 [nz-deprivation-index-2006/](https://koordinates.com/layer/1066-nz-deprivation-index-2006/) (accessed 02/12/17).  
19  
20

21  
22 28 Kwapiszewski RM, Wallace AL. A pilot program to identify and reverse childhood  
23 obesity in a primary care clinic. *Clin Pediatr* 2011;50:630-5.  
24  
25

26  
27 29 Wrotniak BH, Epstein LH, Paluch RA, et al. Parent weight change as a predictor of child  
28 weight change in family-based behavioral obesity treatment. *Arch Pediatr Adolesc Med*  
29 2004;158:342-7 <https://dx.doi.org/10.1001/archpedi.158.4.342>.  
30  
31  
32

33  
34 30 Robinson E, Sutin AR. Parents' perceptions of their children as overweight and children's  
35 weight concerns and weight gain. *Psychol Sci* 2017;28:320-9  
36  
37 <https://dx.doi.org/10.1177/0956797616682027>.  
38  
39

40  
41 31 Andres A, Saldana C, Gomez-Benito J. Establishing the stages and processes of change for  
42 weight loss by consensus of experts. *Obesity* 2009;17:1717-23  
43  
44 <https://dx.doi.org/10.1038/oby.2009.100>.  
45  
46  
47  
48  
49  
50  
51  
52  
53  
54  
55  
56  
57  
58  
59  
60

## STROBE Statement—checklist of items that should be included in reports of observational studies

|                              | Item No | Recommendation                                                                                                                                                                                 | Complete?  |
|------------------------------|---------|------------------------------------------------------------------------------------------------------------------------------------------------------------------------------------------------|------------|
| <b>Title and abstract</b>    | 1       | (a) Indicate the study's design with a commonly used term in the title or the abstract                                                                                                         | ✓ (1, 3-4) |
|                              |         | (b) Provide in the abstract an informative and balanced summary of what was done and what was found                                                                                            | ✓ (3-4)    |
| <b>Introduction</b>          |         |                                                                                                                                                                                                |            |
| Background/rationale         | 2       | Explain the scientific background and rationale for the investigation being reported                                                                                                           | ✓ (5-7)    |
| Objectives                   | 3       | State specific objectives, including any prespecified hypotheses                                                                                                                               | ✓ (8-9)    |
| <b>Methods</b>               |         |                                                                                                                                                                                                |            |
| Study design                 | 4       | Present key elements of study design early in the paper                                                                                                                                        | ✓ (9-12)   |
| Setting                      | 5       | Describe the setting, locations, and relevant dates, including periods of recruitment, exposure, follow-up, and data collection                                                                | ✓ (9-11)   |
| Participants                 | 6       | (a) <i>Cohort study</i> —Give the eligibility criteria, and the sources and methods of selection of participants. Describe methods of follow-up                                                | ✓ (9)      |
|                              |         | (b) <i>Case-control study</i> —Give the eligibility criteria, and the sources and methods of case ascertainment and control selection. Give the rationale for the choice of cases and controls |            |
|                              |         | (c) <i>Cross-sectional study</i> —Give the eligibility criteria, and the sources and methods of selection of participants                                                                      |            |
|                              |         | (d) <i>Cohort study</i> —For matched studies, give matching criteria and number of exposed and unexposed                                                                                       | N/A        |
|                              |         | (e) <i>Case-control study</i> —For matched studies, give matching criteria and the number of controls per case                                                                                 |            |
| Variables                    | 7       | Clearly define all outcomes, exposures, predictors, potential confounders, and effect modifiers. Give diagnostic criteria, if applicable                                                       | ✓ (12-13)  |
| Data sources/<br>measurement | 8*      | For each variable of interest, give sources of data and details of methods of assessment (measurement). Describe comparability of assessment methods if there is more than one group           | ✓ (9-10)   |
| Bias                         | 9       | Describe any efforts to address potential sources of bias                                                                                                                                      | ✓ (13)     |
| Study size                   | 10      | Explain how the study size was arrived at                                                                                                                                                      | ✓ (9)      |
| Quantitative variables       | 11      | Explain how quantitative variables were handled in the analyses. If applicable, describe which groupings were chosen and why                                                                   | ✓ (12-13)  |
| Statistical methods          | 12      | (a) Describe all statistical methods, including those used to control for confounding                                                                                                          | ✓ (12-13)  |
|                              |         | (b) Describe any methods used to examine subgroups and interactions                                                                                                                            | ✓ (12-13)  |
|                              |         | (c) Explain how missing data were addressed                                                                                                                                                    | (13)       |
|                              |         | (d) <i>Cohort study</i> —If applicable, explain how loss to follow-up was addressed                                                                                                            | N/A        |
|                              |         | (e) <i>Case-control study</i> —If applicable, explain how matching of cases and controls was addressed                                                                                         |            |
|                              |         | (f) <i>Cross-sectional study</i> —If applicable, describe analytical methods taking account of sampling strategy                                                                               |            |
|                              |         | (g) Describe any sensitivity analyses                                                                                                                                                          | N/A        |

Continued on next page

| <b>Results</b>           |     |                                                                                                                                                                                                              |               |
|--------------------------|-----|--------------------------------------------------------------------------------------------------------------------------------------------------------------------------------------------------------------|---------------|
| Participants             | 13* | (a) Report numbers of individuals at each stage of study—eg numbers potentially eligible, examined for eligibility, confirmed eligible, included in the study, completing follow-up, and analysed            | ✓ (13-14)     |
|                          |     | (b) Give reasons for non-participation at each stage                                                                                                                                                         | ✓ (13-14, 15) |
|                          |     | (c) Consider use of a flow diagram                                                                                                                                                                           | N/A           |
| Descriptive data         | 14* | (a) Give characteristics of study participants (eg demographic, clinical, social) and information on exposures and potential confounders                                                                     | ✓ (13-14)     |
|                          |     | (b) Indicate number of participants with missing data for each variable of interest                                                                                                                          | ✓ (15)        |
|                          |     | (c) <i>Cohort study</i> —Summarise follow-up time (eg, average and total amount)                                                                                                                             | N/A           |
| Outcome data             | 15* | <i>Cohort study</i> —Report numbers of outcome events or summary measures over time                                                                                                                          | ✓ (15-16)     |
|                          |     | <i>Case-control study</i> —Report numbers in each exposure category, or summary measures of exposure                                                                                                         | N/A           |
|                          |     | <i>Cross-sectional study</i> —Report numbers of outcome events or summary measures                                                                                                                           | N/A           |
| Main results             | 16  | (a) Give unadjusted estimates and, if applicable, confounder-adjusted estimates and their precision (eg, 95% confidence interval). Make clear which confounders were adjusted for and why they were included | ✓ (15-16)     |
|                          |     | (b) Report category boundaries when continuous variables were categorized                                                                                                                                    | N/A           |
|                          |     | (c) If relevant, consider translating estimates of relative risk into absolute risk for a meaningful time period                                                                                             | N/A           |
| Other analyses           | 17  | Report other analyses done—eg analyses of subgroups and interactions, and sensitivity analyses                                                                                                               | ✓ (15-17)     |
| <b>Discussion</b>        |     |                                                                                                                                                                                                              |               |
| Key results              | 18  | Summarise key results with reference to study objectives                                                                                                                                                     | ✓ (17-18)     |
| Limitations              | 19  | Discuss limitations of the study, taking into account sources of potential bias or imprecision. Discuss both direction and magnitude of any potential bias                                                   | ✓ (19)        |
| Interpretation           | 20  | Give a cautious overall interpretation of results considering objectives, limitations, multiplicity of analyses, results from similar studies, and other relevant evidence                                   | ✓ (19)        |
| Generalisability         | 21  | Discuss the generalisability (external validity) of the study results                                                                                                                                        | ✓ (17-19)     |
| <b>Other information</b> |     |                                                                                                                                                                                                              |               |
| Funding                  | 22  | Give the source of funding and the role of the funders for the present study and, if applicable, for the original study on which the present article is based                                                | ✓ (20)        |

\*Give information separately for cases and controls in case-control studies and, if applicable, for exposed and unexposed groups in cohort and cross-sectional studies.

**Note:** An Explanation and Elaboration article discusses each checklist item and gives methodological background and published examples of transparent reporting. The STROBE checklist is best used in conjunction with this article (freely available on the Web sites of PLoS Medicine at <http://www.plosmedicine.org/>, Annals of Internal Medicine at <http://www.annals.org/>, and Epidemiology at <http://www.epidem.com/>). Information on the STROBE Initiative is available at [www.strobe-statement.org](http://www.strobe-statement.org).

# BMJ Open

## Caregiver's readiness for change as a predictor of outcome and attendance in an intervention programme for children and adolescents with obesity: a secondary data analysis.

|                                 |                                                                                                                                                                                                                                                                                                                                                                                                                                                                                                                                                                                                                                                                                                                                                                                                   |
|---------------------------------|---------------------------------------------------------------------------------------------------------------------------------------------------------------------------------------------------------------------------------------------------------------------------------------------------------------------------------------------------------------------------------------------------------------------------------------------------------------------------------------------------------------------------------------------------------------------------------------------------------------------------------------------------------------------------------------------------------------------------------------------------------------------------------------------------|
| Journal:                        | <i>BMJ Open</i>                                                                                                                                                                                                                                                                                                                                                                                                                                                                                                                                                                                                                                                                                                                                                                                   |
| Manuscript ID                   | bmjopen-2018-023195.R1                                                                                                                                                                                                                                                                                                                                                                                                                                                                                                                                                                                                                                                                                                                                                                            |
| Article Type:                   | Research                                                                                                                                                                                                                                                                                                                                                                                                                                                                                                                                                                                                                                                                                                                                                                                          |
| Date Submitted by the Author:   | 04-Oct-2018                                                                                                                                                                                                                                                                                                                                                                                                                                                                                                                                                                                                                                                                                                                                                                                       |
| Complete List of Authors:       | Anderson, Yvonne; Taranaki District Health Board, Department of Paediatrics; University of Auckland Liggins Institute, Paediatric Endocrinology<br>Dolan, Gerard; Taranaki District Health Board<br>Wynter, Lisa; Taranaki District Health Board, Department of Paediatrics<br>Treves, Katharine; Taranaki District Health Board, Department of Paediatrics<br>Wouldes, Trecia; The University of Auckland, Psychological Medicine<br>Grant, Cameron; University of Auckland, Paediatrics<br>Cave, Tami; University of Auckland Liggins Institute<br>Smiley, Anna; University of Auckland Liggins Institute<br>Derraik, José; University of Auckland, Liggins Institute<br>Cutfield, Wayne; University of Auckland, Liggins Institute; Liggins, Institute<br>Hofman, Paul; University of Auckland |
| <b>Primary Subject Heading</b>: | Paediatrics                                                                                                                                                                                                                                                                                                                                                                                                                                                                                                                                                                                                                                                                                                                                                                                       |
| Secondary Subject Heading:      | Paediatrics                                                                                                                                                                                                                                                                                                                                                                                                                                                                                                                                                                                                                                                                                                                                                                                       |
| Keywords:                       | General Paediatrics, Pediatric obesity, Program evaluation, Health Behavior, Childhood obesity intervention, Readiness for change                                                                                                                                                                                                                                                                                                                                                                                                                                                                                                                                                                                                                                                                 |
|                                 |                                                                                                                                                                                                                                                                                                                                                                                                                                                                                                                                                                                                                                                                                                                                                                                                   |

SCHOLARONE™  
Manuscripts

1  
2  
3 **Caregiver's readiness for change as a predictor of outcome and attendance in an**  
4 **intervention programme for children and adolescents with obesity: a secondary**  
5 **data analysis.**  
6  
7  
8  
9

10  
11  
12 **Authors:** Yvonne C Anderson,<sup>1,2</sup> Gerard M S Dolan,<sup>3</sup> Lisa E Wynter,<sup>1</sup> Katharine F  
13 Treves,<sup>1</sup> Trecia A Wouldes,<sup>4</sup> Cameron C Grant,<sup>5,6,7</sup> Tami L Cave,<sup>2</sup> Anna J Smiley,<sup>2</sup>  
14 José G B Derraik,<sup>2,8,9</sup> Wayne S Cutfield,<sup>2,6,8</sup> Paul L Hofman.<sup>2,6</sup>  
15  
16  
17  
18

19 **Affiliation:**

20  
21 <sup>1</sup> Department of Paediatrics, Taranaki District Health Board, New Plymouth, New  
22 Zealand.  
23

24 <sup>2</sup> Liggins Institute, University of Auckland, Auckland, New Zealand.  
25

26 <sup>3</sup> Taranaki District Health Board, New Plymouth, New Zealand.  
27

28 <sup>4</sup> Faculty of Medical and Health Sciences, University of Auckland, Auckland, New  
29 Zealand.  
30

31 <sup>5</sup> Department of Paediatrics, Child and Youth Health, University of Auckland,  
32 Auckland, New Zealand.  
33

34 <sup>6</sup> Starship Children's Hospital, Auckland District Health Board, Auckland, New  
35 Zealand.  
36

37 <sup>7</sup> Centre for Longitudinal Research - He Ara ki Mua, University of Auckland,  
38 Auckland, New Zealand.  
39

40 <sup>8</sup> A Better Start – National Science Challenge, University of Auckland, Auckland,  
41 New Zealand.  
42

43 <sup>9</sup> Department of Women's and Children's Health, Uppsala University, Uppsala,  
44 Sweden.  
45  
46  
47  
48  
49  
50  
51  
52  
53  
54  
55  
56  
57  
58  
59  
60

1  
2  
3 **Keywords:** General Paediatrics, Pediatric obesity, Program evaluation, Health  
4  
5 Behavior, Childhood obesity intervention, Readiness for change  
6

7 **Running title:** Caregiver's readiness for change does not predict obesity intervention  
8  
9 outcome  
10

11 **Contact info:** Yvonne Anderson, Department of Paediatrics, Taranaki Base Hospital,  
12  
13 David Street, New Plymouth 4310. [yvonne.anderson@tdhb.org.nz](mailto:yvonne.anderson@tdhb.org.nz), +00647536139  
14  
15

16 **Word count:** 3659  
17

18 **Clinical Trial Registration:** Australian New Zealand Clinical Trials Registry  
19  
20 (ANZCTR: 12611000862943)  
21  
22  
23  
24  
25  
26  
27  
28  
29  
30  
31  
32  
33  
34  
35  
36  
37  
38  
39  
40  
41  
42  
43  
44  
45  
46  
47  
48  
49  
50  
51  
52  
53  
54  
55  
56  
57  
58  
59  
60



## Abstract

**Objective/design:** It remains unclear as to the efficacy of readiness for change measurements in child and adolescent obesity intervention programmes. This observational study aimed to determine whether the caregiver's stage of change could predict outcome and adherence to treatment in an intensive intervention programme for children and adolescents with obesity.

**Setting:** Participants were from the Whānau Pakari randomised clinical trial, a community based multi-disciplinary intervention programme for obesity in Taranaki, New Zealand.

**Participants:** Eligible participants (recruited January 2012 to August 2014) were aged five to 16 years, and had a body mass index (BMI)  $\geq 98^{\text{th}}$  centile or BMI  $> 91^{\text{st}}$  centile with weight-related comorbidities.

**Interventions:** This study only assessed participants randomised to the high-intensity intervention programme (6-monthly assessments with weekly group sessions for 12 months) given attendance data were required (n=96).

**Primary and secondary outcome measures:** Primary trial outcome was BMI standard deviation score (SDS). Secondary outcome measures included indices such as fruit and vegetable intake, 550-m run/walk time, and quality of life scores. At baseline assessment, participants (if  $> 11$  years old) and their accompanying adult were assessed for readiness to make healthy lifestyle change.

**Results:** A quantitative measure of stage of change in caregivers was not a predictor of primary or secondary outcomes (change in BMI SDS pre-contemplation/contemplation -0.08, 95% CI -0.18, 0.03, action -0.16, 95% CI -0.27, -0.05,  $p=0.27$ ), or overall attendance in the weekly activity sessions (40.0% versus 37.1% respectively,  $p=0.54$ ) in the child or adolescent.

1  
2  
3 **Conclusions:** Caregiver's stage of change was not a predictor of success in this multi-  
4  
5 disciplinary intervention programme for children and adolescents with obesity. Future  
6  
7 research needs to determine participants' factors for success.  
8  
9

10  
11  
12 **Strengths and limitations of this study:**  
13

- 14 • This study utilised both qualitative and quantitative assessments to assess  
15  
16 readiness for change.  
17
- 18 • This study achieved high representation from indigenous populations and those  
19  
20 from the most deprived households.  
21
- 22 • This study utilised analysis of readiness for change as a dichotomous and  
23  
24 continuous variable.  
25
- 26 • Limitations included the utilisation of an assessment tool that has not been used  
27  
28 previously, and a sample size that was relatively small and potentially  
29  
30 underpowered to detect significant differences in certain outcomes.  
31
- 32 • Preparation and action groups were merged as both were offered intervention in  
33  
34 clinical practice. However, it could be argued that these stages of change should  
35  
36 not be merged, and therefore is a noted limitation.  
37  
38  
39  
40  
41  
42  
43  
44  
45  
46  
47  
48  
49  
50  
51  
52  
53  
54  
55  
56  
57  
58  
59  
60

## Introduction

Determining whether a participant is psychologically at a point of “readiness” to make lifestyle change is part of any consultation in clinical practice regarding changes in health. However this is an ill-defined process, and usually qualitative in nature. Readiness for change is a concept derived from the transtheoretical model defining stages of behavioural change related to addiction.[1] When committing to behavioural change, an individual may transition through defined stages at variable rates and the progression is not always a linear process. *Pre-contemplation* is the stage where an individual can be described as feeling they “do not have a problem”. *Contemplation* is when the individual acknowledges they “may have a problem”. *Preparation* – the individual acknowledges they “may have a problem and need to do something”. *Action* – “I will try these changes”. *Maintenance* - “The changes I have made are now part of what I do”.[1]

Assessment of an individual’s motivation for smoking cessation is an example of utilisation of the transtheoretical model.[2] Various tools based on the original readiness for change questionnaire (based on high alcohol use) have been utilised in the obesity setting.[3-5] However, little has been reported about the efficacy of readiness for change assessment in relation to outcome in children/adolescents with obesity, and whether an individual’s readiness in the ‘moment in time’ around an assessment will result in persistent motivation to make lifestyle change. It is too simplistic to treat all individuals the same in terms of moving through stages of change, and tailoring interventions to the individual stage of change rather than treating all participants as if they are in preparation or action stages is considered important.[4] A Brazilian study of children and adolescents aged 10 to 18 years found

1  
2  
3 that there was an association between baseline stage of change and anthropometric  
4 outcomes after a short (16-week) intervention for weight (maintenance stage of  
5 change being favourable).[6] Nonetheless, there was no association between  
6 adolescents' adherence to treatment and their baseline stage of change. Past  
7 international clinical practice guidelines and reviews have recommended the  
8 importance of health care professionals assessing readiness and barriers to change  
9 prior to implementing any healthy lifestyle plan for weight management.[7-9]

10  
11  
12  
13  
14  
15  
16  
17  
18  
19  
20  
21 A parent's readiness has been identified as a key consideration in a child or  
22 adolescent's ability to make and maintain lifestyle changes. Factors associated with  
23 being at a greater degree of readiness for change in one study were having a child that  
24 was overweight, or an older child ( $\geq 8$  years), believing their own weight or their  
25 child's weight was above average, and perceiving that their child's weight was a  
26 health problem.[5] Parental *confidence* in their ability to do well in a treatment  
27 programme was cited as the strongest predictor of treatment completion and early  
28 treatment response in an Iceland study of an 18-week intervention for 7.5 to 13.6-  
29 year-old children.[10] Importantly however, this variable was not associated with  
30 child outcome at 1-year follow-up. Parental *perception* of their child's weight status is  
31 also an important consideration; parents' ability to identify when their child was  
32 overweight has been found to be limited.[11] Parental *recognition* of child overweight  
33 has been found to be a predictor of behavioural intentions, but these intentions are not  
34 always translated into behaviours.[12] Therefore, high parental readiness does not  
35 necessarily equate to being ready to engage in lifestyle interventions for their child  
36 affected by overweight/obesity.[13]

1  
2  
3 A recent systematic review of barriers and facilitators to initial (and continued)  
4 attendance in childhood weight management programmes for primary school-aged  
5 children found that parents provide the motivation for programme commencement,  
6 largely catalysed by their worry surrounding the psychological health and wellbeing  
7 of their child.[14] Non-modifiable predictors of initial and continued attendance  
8 included gender (programmes favoured females), ethnicity (favoured ethnic majority),  
9 family structure (favoured two-parent families), and socioeconomic background  
10 (favoured lower level of deprivation).[14] Body mass index (BMI) or age at entry  
11 were not associated with attendance. In the context of Aotearoa/New Zealand (NZ),  
12 engagement for Pacific Island parents/caregivers in a weight-management programme  
13 was attractive when it was family-based - providing support for each other,  
14 highlighting the importance of recognising cultural appropriateness in  
15 programmes.[15] Moreover, parents can be in differing stages of change for varying  
16 aspects of healthy lifestyle change; one study demonstrated different parental stages  
17 of change for modification of their children's dietary versus physical activity  
18 behaviours.[16]

19  
20  
21  
22  
23  
24  
25  
26  
27  
28  
29  
30  
31  
32  
33  
34  
35  
36  
37  
38  
39  
40  
41  
42  
43 Clinician assessment of stage of change is usually qualitative. However, if a  
44 quantitative tool at assessment could determine the likelihood of healthy lifestyle  
45 change, this could inform prioritisation of health resources where they are more likely  
46 to lead to positive outcomes.[17] A previous audit of a healthy lifestyle initiative in  
47 NZ found there was a need to assess stage of change of families prior to programme  
48 commencement, as it was not uncommon for the coordinator to visit an empty house,  
49 impacting on the use of valuable resource.[18] A new model was created, which  
50 incorporated assessment of readiness to make healthy lifestyle change.[17] The  
51  
52  
53  
54  
55  
56  
57  
58  
59  
60

1  
2  
3 service, created and named 'Whānau Pakari', is a multi-disciplinary assessment and  
4 intervention programme for children/adolescents with obesity, with a randomised  
5  
6 clinical trial (RCT) embedded within the service to assess outcomes.[17] The results  
7  
8 of the RCT showed a mean change in body mass index (BMI) standard deviation  
9  
10 score (SDS) at 12-months from baseline of -0.12 in the low-intensity control group  
11  
12 (6-monthly assessments and advice), and -0.10 in the high-intensity intervention  
13  
14 group (weekly group sessions with 6-monthly assessments and advice).[19] However,  
15  
16 if  $\geq 70\%$  attendance was achieved in the high-intensity intervention, the effect was  
17  
18 doubled (-0.22 SDS).[19] Baseline stage of change in the caregiver (committed family  
19  
20 member or legal guardian) in both groups was not different - control group:  
21  
22 preparation/action (n=54, 56%), vs. pre-contemplation/contemplation (n=43, 44%);  
23  
24 intervention group: preparation/action (n=43; 43%) vs. pre-  
25  
26 contemplation/contemplation (n=57, 57%; p=0.08).  
27  
28  
29  
30  
31  
32  
33  
34

35 The aims of this study were twofold: first, to investigate whether the caregiver's stage  
36  
37 of change at baseline using a standardised measure of readiness for change[3]  
38  
39 (adapted to focus on attitudes towards eating habits, weight and physical activity)  
40  
41 predicted our primary outcome of the trial (BMI SDS) and/or the secondary outcomes  
42  
43 in the Whānau Pakari 12-month intervention (such as waist circumference, number of  
44  
45 breakfasts eaten, servings of fruit and vegetables, sweet drink consumption, 550-m  
46  
47 walk/run time, steps per day, indices on quality of life and behaviour checklists, and  
48  
49 biochemical markers); and second, to determine whether stage of change was  
50  
51 predictive of adherence to treatment. It was hypothesised that those caregivers  
52  
53 expressing a higher stage of change (i.e. preparation and action) would see greater  
54  
55  
56  
57  
58  
59  
60

1  
2  
3 improvements in their children/adolescents in terms of primary and secondary  
4 outcomes, and demonstrate greater programme adherence.  
5  
6  
7  
8  
9

## 10 **Methods**

### 11 *Participants*

12  
13  
14 Taranaki has a population of approximately 23,139 children aged 0-15 years, of  
15 which 81% identify as NZ European (NZE), 28% as Māori, and 1% as other ethnicity  
16 (multiple ethnicities possible).[20] Eligible participants (recruited January 2012 to  
17 August 2014 as part of the Whānau Pakari trial) were aged five to 16 years, and had a  
18 BMI  $\geq$ 98<sup>th</sup> centile or BMI  $>$ 91<sup>st</sup> centile with weight-related comorbidities.[21] BMI  
19 percentile and BMI SDS were calculated as per UK 1990 growth reference data, using  
20 the KIGS auxology software (Pfizer Endocrine Care TM).[22] One aspect of  
21 eligibility was being pre-contemplative or above on the readiness for change scoring.  
22 We purposely set the bar low for readiness to change (i.e. below the pre-  
23 contemplative level) to assess whether *degree* of readiness for change predicts  
24 outcome;[17] therefore, only those classed as not ready for change on stage of change  
25 assessment were excluded from this study.  
26  
27  
28  
29  
30  
31  
32  
33  
34  
35  
36  
37  
38  
39  
40  
41  
42  
43  
44

45 The rationale and study design for the Whānau Pakari trial have been previously  
46 reported, as have 12-month outcomes.[17, 19] In brief, the RCT compared a 12-  
47 month intensive intervention with home-based comprehensive assessments (medical,  
48 dietary, physical activity and psychology screening) and weekly activity sessions  
49 (group sessions for 12 months, including physical activity, nutrition and psychology  
50 content) with a minimal intensity control with home-based assessments only,  
51 including 6-monthly follow-up, conducted in Taranaki, NZ. For the purposes of this  
52  
53  
54  
55  
56  
57  
58  
59  
60

1  
2  
3 study, given we were interested in stage of change in relation to outcome, only  
4  
5 participants in the intensive intervention arm were included.  
6  
7

### 10 *Assessments*

11  
12 Whānau Pakari was a novel home-based ‘demedicalised’ model (no hospital visits,  
13  
14 with a comprehensive weight-related medical assessment in the home) that was  
15  
16 family-centred. The assessment included dietary, physical and psychological review,  
17  
18 with evaluation of stage of change. Secondary outcomes included waist  
19  
20 circumference; number of breakfasts eaten per week; servings of fruit and vegetables  
21  
22 per day; consumption of sweet drinks per day (ml); 550-m walk/run time  
23  
24 (minutes);[23] actual steps per day and actual time spent on moderate-intensity to  
25  
26 very vigorous physical activity per day – measured using accelerometers (ActiGraph  
27  
28 wGT3X-BT; Actigraph LLC, Pensacola, Florida, USA); total reported activity per  
29  
30 day (minutes); reported screen time per day (minutes); total generic scaled score  
31  
32 (child); total generic scaled score (parent) – both from Pediatric Quality of Life  
33  
34 (PedsQL)<sup>TM</sup> questionnaire;[24] Achenbach Child Behavior Checklist (CBCL)  
35  
36 internalising, externalising and total raw scores;[25] as well as glycated haemoglobin  
37  
38 (HbA1c) and fasting insulin (pmol/L).  
39  
40  
41  
42  
43  
44  
45  
46

47 At the end of the baseline assessment, two assessments of readiness for change were  
48  
49 undertaken. The healthy lifestyle coordinator’s qualitative judgement of stage of  
50  
51 change, ranked pre-contemplation, contemplation, and preparation/action for child (if  
52  
53 >11 years of age) and committed family member/caregiver was recorded first. The  
54  
55 trial-designed questionnaire was completed by the child (if >11 years of age) and  
56  
57 another version of the questionnaire for the caregiver (in every participant). For  
58  
59  
60



1  
2  
3 comparative analysis, preparation was merged with action, resulting in three possible  
4 stages of change. This was a pragmatic decision based on clinical grounds; if stage of  
5 change was found to be a predictor of outcome, a caregiver that demonstrated  
6 preparation or action ratings for stage of change would be likely to be offered a place  
7 for their family in the intensive intervention in the “real-world”, fiscally constrained  
8 setting outside of an RCT; whereas those that were pre-contemplative or  
9 contemplative were more likely to be offered motivational interviewing, and a follow-  
10 up assessment at a later date.  
11  
12  
13  
14  
15  
16  
17  
18  
19  
20  
21  
22

### 23 *Readiness for change as a dichotomous measure*

24 The readiness for change questionnaire was based on Rollnick et al.’s original  
25 readiness to change questionnaire,[3] which we modified to focus on beliefs around  
26 weight, eating habits, and physical activity levels. A 5-point Likert scale was used.  
27 Given the complexity of obesity, additional questions were added to the original  
28 questionnaire, resulting in a 21-item child/adolescent questionnaire and a 27-item  
29 questionnaire for the family member, with 6 extra questions related to  
30 attitudes/behaviour of the wider family unit. The questionnaire was tested for  
31 understanding and comprehension in a randomly selected cohort of clinic patients  
32 prior to trial commencement, who were underweight, normal weight, and overweight.  
33 This pilot testing found the questionnaire was acceptable for use (i.e. underweight  
34 children were scored pre-contemplative).  
35  
36  
37  
38  
39  
40  
41  
42  
43  
44  
45  
46  
47  
48  
49

50 Questions were reverse keyed in their language to negate the need to reverse the pre-  
51 contemplative scaled score when comparing the three scores for each stage of change  
52 with each other. Scoring was undertaken, which calculated the sum totals for each  
53 stage of change (pre-contemplation, contemplation or preparation/action). This was  
54  
55  
56  
57  
58  
59  
60

1  
2  
3 divided by the number of questions asked to obtain an adjusted score for each stage of  
4  
5 change. The highest adjusted score was designated as the stage of change of the  
6  
7 child/adolescent or family member.  
8  
9

### 10 11 12 *Attendance*

13  
14 Attendance was calculated as a percentage based on the number of weekly activity  
15  
16 sessions offered to each individual family over the 12-month period of their  
17  
18 involvement in the programme.  
19  
20  
21  
22

### 23 24 *Ethics*

25  
26 Ethics approval for the trial was granted by the Central Health and Disability Ethics  
27  
28 Committee (NZ) (CEN/11/09/054). Written and verbal informed consents were  
29  
30 obtained from all participants or their guardians. Trial registration was with the  
31  
32 Australian NZ Clinical Trials Registry (ANZCTR: 12611000862943).  
33  
34  
35  
36  
37

### 38 39 *Participant and Public Involvement*

40 This study was designed in response to our discussions working with families, and the  
41  
42 need for a more sophisticated form of triage for referred participants wishing to  
43  
44 engage with the healthy lifestyle programme. Participants were not officially involved  
45  
46 in study design. Results will not be officially disseminated to study participants,  
47  
48 however, we ensure that findings are published in open access formats wherever  
49  
50 possible so they are freely available to the community.  
51  
52  
53  
54  
55

### 56 57 *Power calculation*

1  
2  
3 A total of 68 study participants had attendance data and completed the 12-month  
4 assessments. Based on the changes from baseline observed at 12 months in our study  
5 population, and with n of 32 and 36 in each group, our study was powered to detect  
6 statistically significant differences in change from baseline in BMI of  $\pm 0.21$  SDS, in  
7 waist circumference of  $\pm 3.5$  cm, and in parent's total generic scaled score of  $\pm 11.1$ ,  
8 with  $\alpha=0.05$  and 80% power.  
9  
10  
11  
12  
13  
14  
15  
16  
17  
18

### 19 *Data analyses*

20  
21 Cronbach's alpha (a numerical measure of internal consistency) was used to establish  
22 the reliability of the quantitative readiness for change questionnaire. The agreement  
23 between qualitative and quantitative assessments was examined using Spearman's  
24 rank ( $\rho$ ) and Kendall's ( $\tau$ ) correlation coefficients. Generalised linear regression  
25 models were used to compare study outcomes (as described above and in the  
26 quantitative stage of change and outcome measures section of the results) in the  
27 children according to the family member's stage of change (pre-  
28 contemplation/contemplation vs preparation/action). Models were adjusted for  
29 child/adolescent's ethnicity, gender, age at assessment, level of stage of change,  
30 economic deprivation, as well as the respective parameter at baseline.  
31  
32  
33  
34  
35  
36  
37  
38  
39  
40  
41  
42  
43  
44  
45  
46

47 Subgroup analyses were also performed examining the associations within age  
48 groups; specifically among children aged less than 11 years of age and among those  
49 aged 11 years or older. Demographic parameters were compared using chi-square  
50 tests and non-parametric Kruskal-Wallis tests. Multivariable models were run as  
51 described previously, except that age at assessment was no longer included as a  
52 covariate.  
53  
54  
55  
56  
57  
58  
59  
60

Statistical analyses were performed in SAS v9.4 (SAS Institute, Cary, NC, USA) and Minitab v.16 (Pennsylvania State University, State College, PA, USA). All statistical tests were two-tailed, with significance level maintained at  $p < 0.05$ .

## Results

A total of 102 participants were randomised to the intense intervention arm. The flow of participants through the trial has been previously reported.[19] Two participants were excluded after randomisation; due to new medical diagnoses likely to affect weight status. Of the remaining 100, one participant relocated, never attending a session, and three had longer attendance than offered in the intervention, leaving 96 participants with complete attendance data. Table 1 shows the baseline characteristics of the participants.

**Table 1.** Baseline characteristics of the 96 intervention participants with complete attendance data. Age and body mass index (BMI) data are means and standard deviations.

|                                                 |                          | <b>Intervention</b> |
|-------------------------------------------------|--------------------------|---------------------|
| <b>n</b>                                        |                          | 96                  |
| <b>Age (years)</b>                              |                          | 10.7 (3.07)         |
| <b>Females (n, %)</b>                           |                          | 48 (50.0%)          |
| <b>Ethnicity (n, %)<sup>†</sup></b>             | Māori                    | 45 (46.9%)          |
|                                                 | New Zealand European     | 40 (41.7%)          |
|                                                 | Asian                    | 5 (5.2%)            |
|                                                 | Pacific                  | 2 (2.1%)            |
|                                                 | Other                    | 4 (4.1%)            |
| <b>Anthropometry</b>                            | BMI (kg/m <sup>2</sup> ) | 29.6 (6.11)         |
|                                                 | BMI SDS                  | 3.11 (0.59)         |
| <b>Deprivation index (quintile)<sup>‡</sup></b> | 1 (least deprived)       | 14 (14.6%)          |
|                                                 | 2                        | 19 (19.8%)          |

|                                        |                                                |             |
|----------------------------------------|------------------------------------------------|-------------|
|                                        | 3                                              | 17 (17.7%)  |
|                                        | 4                                              | 22 (22.9%)  |
|                                        | 5 (most deprived)                              | 24 (25%)    |
| <b>Accompanying adult</b>              | Mother                                         | 74 (77.1%)  |
|                                        | BMI (kg/m <sup>2</sup> ) <sup>§</sup>          | 32.6 (7.26) |
|                                        | BMI ≥30 kg/m <sup>2</sup> (obese) <sup>§</sup> | 56 (61.5%)  |
| <b>Living arrangements<sup>¶</sup></b> | Two-parent household                           | 52 (55.9%)  |
|                                        | One-parent household                           | 37 (39.8%)  |
|                                        | Other                                          | 4 (4.3%)    |

Abbreviations: BMI, body mass index, SDS, standard deviation score.

<sup>†</sup>Prioritised ethnic group.

<sup>‡</sup>Quintiles of level of household deprivation based on the New Zealand Deprivation Index 2006.[26]

<sup>§</sup> Parameter was measured where consented to (n=91), otherwise not included.

<sup>¶</sup>n=93.

### *Reliability*

Reliability of the readiness for change questionnaire (caregiver and child/adolescent) using Cronbach's alpha was 0.62 for the child/adolescent questionnaire, and 0.65 for caregiver questionnaire.

Statistically, there was no evidence of an agreement found between the caregiver's and child/adolescent's questionnaires as per Kendall's correlation coefficient ( $\tau=0.60$ ;  $p=0.11$ ). However, scores from the caregiver's questionnaire and qualitative assessment were positively correlated ( $\rho=0.28$ ;  $p=0.005$ ) and showed moderate agreement ( $\tau=0.64$ ;  $p=0.03$ ). Similarly, the child/adolescent's questionnaire and qualitative assessment scores were also correlated ( $\rho=0.38$ ;  $p=0.01$ ), with some evidence of moderate agreement ( $\tau=0.69$ ;  $p=0.05$ ).

### *Quantitative stage of change and outcome measures*

Of the 96 participants, 68 had attendance data and assessment data at 12 months.

Table 2 shows the stratified association between quantitative stage of change (caregiver) at baseline assessment and outcome at 12 months.

**Table 2.** Change at 12 months from baseline in association with the quantitative stage of change of caregiver at baseline (preparation/action versus pre-contemplation/contemplation)

|                                                                                | Preparation/<br>action | Pre-contemplation/<br>contemplation* | Difference          | P-value <sup>‡</sup> |
|--------------------------------------------------------------------------------|------------------------|--------------------------------------|---------------------|----------------------|
| N                                                                              | 32                     | 36                                   |                     |                      |
| <b>Primary outcome</b>                                                         |                        |                                      |                     |                      |
| BMI SDS                                                                        | -0.16 (-0.27, -0.05)   | -0.08 (-0.18, 0.03)                  | -0.09 (-0.24, 0.07) | 0.27                 |
| <b>Secondary outcomes</b>                                                      |                        |                                      |                     |                      |
| Waist circumference (cm)                                                       | 1.5 (-0.5, 3.5)        | 2.7 (0.9, 4.6)                       | -1.3 (-4.0, 1.5)    | 0.36                 |
| Number of breakfasts eaten                                                     | 0.2 (-0.5, 0.8)        | 0.1 (-0.4, 0.7)                      | 0.0 (-0.8, 0.9)     | 0.95                 |
| Servings fruit/vegetables per day (n)                                          | 0.7 (0.0, 1.3)         | 1.2 (0.6, 1.8)                       | -0.5 (-1.4, 0.4)    | 0.24                 |
| Sweet drinks per day (ml)                                                      | -191 (-261, -121)      | -126 (-191, -62)                     | -65 (-164, 35)      | 0.20                 |
| 550-m walk/run time (minutes)                                                  | -0.5 (-0.7, -0.3)      | -0.5 (-0.7, -0.3)                    | 0.0 (-0.3, 0.3)     | 0.84                 |
| Actual steps per day (n)                                                       | 203 (-890, 1296)       | -403 (-1319, 513)                    | 605 (-889, 2100)    | 0.41                 |
| Actual moderate-intensity to very vigorous physical activity per day (minutes) | 7.2 (-3.1, 17.5)       | -9.0 (-17.6, -0.3)                   | 16.2 (2.2, 30.2)    | 0.03                 |
| Total reported activity per day (minutes)                                      | 25 (-6, 55)            | 20 (8, 48)                           | 5 (-38, 48)         | 0.82                 |
| Reported screen time per day (minutes)                                         | -17 (-51, 18)          | -21 (-53, 11)                        | 4 (-45, 53)         | 0.86                 |
| Total generic scaled score – child                                             | 7.9 (3.2, 12.7)        | 7.4 (3.0, 11.8)                      | 0.5 (-6.3, 7.3)     | 0.87                 |
| Total generic scaled score – parent                                            | 9.2 (2.8, 15.6)        | 7.7 (1.8, 13.5)                      | 1.5 (-7.7, 10.8)    | 0.74                 |
| CBCL internalising raw score                                                   | -3.2 (-5.5, -0.8)      | -3.4 (-5.6, -1.2)                    | 0.2 (-3.1, 3.6)     | 0.89                 |
| CBCL externalising raw score                                                   | -3.1 (-5.6, -0.6)      | -2.0 (-4.3, 0.3)                     | -1.1 (-4.6, 2.4)    | 0.52                 |
| CBCL total raw score                                                           | -11.7 (-18.5, -4.8)    | -8.5 (-14.9, -4.8)                   | -3.1 (-12.9, 6.6)   | 0.52                 |
| HbA1c (mmol/mol) <sup>§</sup>                                                  | -0.8 (-2.3, 0.7)       | -0.3 (-1.7, 1.1)                     | -0.5 (-2.6, 1.6)    | 0.63                 |
| Fasting insulin (pmol/L) <sup>¶</sup>                                          | -10 (-42, 24)          | 7 (-24, 39)                          | -17 (-65, 31)       | 0.48                 |

Abbreviations: BMI SDS, body mass index standard deviation score; CBCL, Achenbach Child Behavior Checklist; HbA1c, glycated haemoglobin.

\*Data are means and 95% confidence intervals adjusted for child/adolescent's ethnicity, gender, level of deprivation, age at assessment and the respective parameter at baseline.

†P-value for a difference in change from baseline between pre-contemplation/contemplation and action groups.

§n=51.

¶n=56.

There were no differences in BMI SDS change from baseline between groups according to caregiver's stage of change ( $p=0.27$ ; Table 2). Among secondary outcomes, family members in the stage of preparation/action spent 16.2 minutes more on moderate-intensity to very vigorous physical activity per day compared to those in pre-contemplation/contemplation ( $p=0.03$ ; Table 2). There were no other differences in secondary outcomes (Table 2).

The caregiver's stage of change was not associated with the child/adolescent's ethnicity ( $p=0.54$ ), gender ( $p=0.71$ ), level of household deprivation ( $p=0.88$ ), or age at assessment ( $p=0.10$ ). This was also seen for the qualitative stage of change in the caregiver ( $p=0.63$ ;  $p=0.55$ ;  $p=0.08$ ; and  $p=0.59$ , respectively).

#### *Age of child*

There was no association between changes at 12 months from baseline among children based on age, and caregiver's readiness for change (Supplementary Tables 1 and 2), apart from a between-group difference in the <11-year group for actual moderate to very vigorous activity ( $p=0.02$ ).

#### *Attendance*

1  
2  
3 Median attendance at the weekly activity sessions was 35% (IQR 66%). The  
4 quantitative readiness for change questionnaire for the caregiver was used for all  
5 analyses of outcome, as these were available for the entire cohort. In multivariate  
6 analyses, there was no association between quantitative stage of change of the  
7 caregiver and attendance overall in the intervention; preparation/action 37.1% (n=43)  
8 versus pre-contemplation/contemplation 40.0% (n=53);  $p=0.54$ .  
9  
10  
11  
12  
13  
14  
15  
16  
17  
18

19 For the qualitative assessment of readiness for change of the caregiver, overall  
20 attendance was greater for the pre-contemplation/contemplation group than in the  
21 preparation/action group (49.6% vs. 36.5%;  $p=0.009$ ). In addition, the greater the  
22 level of household deprivation, the lower the attendance at the intervention overall  
23 ( $p=0.004$ ), while mean attendance was greater among NZ Europeans compared with  
24 non-Europeans (49.5% vs. 36.6%;  $p=0.003$ ). Further analyses were based on the  
25 quantitative measure of readiness for change.  
26  
27  
28  
29  
30  
31  
32  
33  
34  
35  
36  
37

### 38 Discussion

39 This study found that assessment of accompanying caregiver's stage of change on  
40 quantitative assessment at baseline was not a predictor of primary or secondary  
41 outcomes, or overall adherence in a multi-disciplinary intervention programme for  
42 children and adolescents with obesity. This is important, given that attendance was  
43 found in the intensive intervention to have a doubling of effect in terms of BMI SDS  
44 reduction.[19] Deprivation and ethnicity did not affect caregiver stage of change.  
45  
46  
47  
48  
49  
50  
51  
52  
53  
54  
55

56 It was not surprising that caregiver's stage of readiness to make lifestyle changes was  
57 not a good predictor of child/adolescent outcome. Indeed, caregiver readiness is one  
58  
59  
60



1  
2  
3 factor in a complex multitude of factors predicting success in achieving reductions in  
4 weight status, such as perception of child weight status, and recognition of weight as a  
5 problem.[11, 12] Environmental factors, such as access to transport to sessions, food  
6 security, and availability of a caregiver to attend sessions also will affect outcome.  
7  
8 Such factors are likely to be why the results from this study were not significant.  
9  
10 While readiness models have shown promise in child obesity pilot programmes,[27] it  
11 is clear that acknowledgement of child obesity as a problem by the individual and  
12 family members is essential for lifestyle change to occur.[5] Our findings are  
13 consistent with a previous Icelandic study, which found that parental confidence for  
14 doing well in treatment (18-week intervention) was not associated with child outcome  
15 at 1-year follow-up.[10] The stage of change model is a snapshot in time, and does  
16 not necessarily represent future behaviour.[12]

17  
18  
19  
20  
21  
22  
23  
24  
25  
26  
27  
28  
29  
30  
31  
32  
33 The actions of parents and their stage of change are inherently linked to outcomes for  
34 a child; a study of 142 families found that changes in parental BMI SDS significantly  
35 predicted child's BMI SDS change at 0-6 and 0-24 months in a family-based  
36 intervention.[28] However, the situation is complex; a recent study showed that  
37 children whose parents perceive them to be overweight are more likely to have  
38 negative views about their own body size, and are more likely to be trying to lose  
39 weight. In these children, a counterintuitive association between parents' perceptions  
40 of their children as being overweight, and subsequent weight gain in those children  
41 was found.[29] It was previously observed that several demographic factors and  
42 personal perceptions are associated with a parent's readiness to assist with their  
43 child's weight status.[5] These findings highlight that in any multi-disciplinary  
44 intervention programme, healthy lifestyle change needs to be the focus, rather than  
45  
46  
47  
48  
49  
50  
51  
52  
53  
54  
55  
56  
57  
58  
59  
60

1  
2  
3 concepts of weight or obesity.  
4  
5  
6  
7

8 Whilst the transtheoretical model based on readiness for change offers a  
9 comprehensive framework, assessment instruments, such as the URICA, the S-  
10 Weight/P-Weight, and the Decisional Balance Inventory (DBI) offer practical  
11 applications.[30] Review of these measures found the S-Weight/P-Weight to be the  
12 most efficient, providing stage of change and the process of change an individual is  
13 using.[30] The S-Weight consists of 5 items assessing stage of change, with the P-  
14 Weight having 34 items measuring four processes of change; emotional re-evaluation,  
15 weight management actions, environmental restructuring, and weight consequences  
16 evaluation.[30] These were created by international expert consensus.[31] However,  
17 to our knowledge, such instruments are not available for use in both parents and  
18 children.  
19  
20  
21  
22  
23  
24  
25  
26  
27  
28  
29  
30  
31  
32  
33  
34

35 Strengths of this study include the use of both qualitative and quantitative assessments  
36 of readiness for change. Due to the high representation from indigenous populations  
37 and those from the most deprived households, analysis in terms of ethnicity and  
38 deprivation were possible. Limitations of this study include lack of measurement of  
39 self-efficacy, and overall confidence to make changes. Confidence in making changes  
40 in physical activity and eating behaviour were included in both quantitative  
41 questionnaires, however. The assessment tool has not been used previously, and  
42 sample size was also relatively small, and potentially underpowered to detect  
43 statistically significant differences for certain outcomes. This programme required the  
44 attendance of an accompanying adult, irrespective of the age of the child/adolescent,  
45 yet the age of the child did not appear to have an effect on outcome. It could be  
46  
47  
48  
49  
50  
51  
52  
53  
54  
55  
56  
57  
58  
59  
60

1  
2  
3 argued that preparation and action should not be merged for the purposes of analysis.  
4  
5 However, as outlined previously, this was a decision based on how the outcomes  
6  
7 would be used in clinical practice.  
8  
9

10  
11  
12 It had been hoped that, if the readiness for change measure was predictive of success  
13  
14 in outcome measures, then creation of paired interventions relating to motivation for  
15  
16 change for those in earlier stages of change, superseded by direct interventions for  
17  
18 those in later stages could achieve less attrition from the programme.[17] This would  
19  
20 lead to efficiency gains and cost effective utilisation of finite health resource.  
21  
22 However, this was not the case. Further development of a measure of readiness for  
23  
24 change in this context is warranted.  
25  
26  
27  
28  
29

30  
31 In conclusion, assessment of caregiver's readiness for change in this multi-  
32  
33 disciplinary intervention for children/adolescents with obesity was not a successful  
34  
35 predictor of outcome or attendance. Whilst expert panels are recommending  
36  
37 determination of a family's readiness for change in the overall psychosocial  
38  
39 assessment of a child with obesity,[9] this process remains ill defined. Future research  
40  
41 needs to determine participants' factors for success in making healthy lifestyle  
42  
43 changes.  
44  
45  
46  
47  
48

49 **Funding:** This work was supported by grants from the Health Research Council of  
50  
51 NZ, Royal Australasian College of Physicians, Maurice and Phyllis Paykel Trust,  
52  
53 Taranaki Medical Foundation, and Lotteries Health Research.  
54  
55  
56  
57  
58  
59  
60

1  
2  
3 **Competing Interests Statement:** Dr. Anderson reports grants from Health Research  
4 Council of NZ, grants from Royal Australasian College of Physicians, grants from  
5 Maurice and Phyllis Paykel Trust, grants from Taranaki Medical Foundation during  
6 the conduct of the study; Ms. Cave and Ms. Smiley report grants from Taranaki  
7 Medical Foundation, grants from Maurice and Phyllis Paykel Trust, grants from  
8 Lotteries Health Research during the conduct of the study; Dr. Hofman reports grants  
9 from Lotteries Health Research during the conduct of the study; Dr. Dolan, Ms.  
10 Wynter, Dr. Treves, Dr. Wouldes, Dr. Grant, Dr. Derraik, and Dr. Cutfield have  
11 nothing to disclose.  
12  
13  
14  
15  
16  
17  
18  
19  
20  
21  
22  
23  
24  
25

26 **Author's Contributions:**

27  
28 YCA designed the study, coordinated the trial, provided paediatrician oversight,  
29 drafted the initial manuscript, and approved the final manuscript as submitted. GMSD  
30 created the trial-designed readiness for change quantitative assessment tool. LEW  
31 recruited participants and undertook assessments and data entry. KFT provided  
32 psychologist oversight and analysis of patient data. TAW assisted with study design,  
33 and reliability/validity of the questionnaires. CCG is secondary supervisor for the  
34 research team, and assisted with study design. TLC supervised data entry and  
35 cleaning. AJS assisted with data entry and attendance data. JGBD undertook data  
36 analysis. WSC contributed to study design. PLH contributed to study design, and  
37 supervised the research team. All authors contributed to discussions and critically  
38 appraised the manuscript. All authors approved the final manuscript as submitted and  
39 agree to be accountable for all aspects of the work.  
40  
41  
42  
43  
44  
45  
46  
47  
48  
49  
50  
51  
52  
53  
54  
55  
56  
57

58 **Data sharing statement:** Anonymised and deidentified data will be made available  
59  
60

1  
2  
3 to other investigators upon request. Interested readers should contact the senior  
4  
5 author PH (p.hofman@auckland.ac.nz) to obtain the data.  
6  
7  
8  
9

## 10 **References**

11  
12  
13 1 Prochaska JO, DiClemente CC. Transtheoretical therapy: Toward a more integrative model  
14 of change. *Psychotherapy: Theory, Research & Practice* 1982;19:276-88.  
15  
16

17  
18 2 DiClemente CC, Prochaska JO. Self-change and therapy change of smoking behavior: a  
19 comparison of processes of change in cessation and maintenance. *Addict Behav* 1982;7:133-  
20  
21  
22  
23 42.  
24  
25

26 3 Rollnick S, Heather N, Gold R, et al. Development of a short "readiness to change"  
27 questionnaire for use in brief, opportunistic interventions among excessive drinkers. *Br J*  
28  
29  
30  
31  
32  
33  
34  
35  
36  
37  
38  
39  
40  
41  
42  
43  
44  
45  
46  
47  
48  
49  
50  
51  
52  
53  
54  
55  
56  
57  
58  
59  
60  
*Addict* 1992;87:743-54. <http://pediatrics.aappublications.org/content/116/1/e94> (accessed  
02/12/17).

4 Hoke M, Timmerman G. Transtheoretical Model: potential usefulness with overweight rural  
Mexican American women. *Hisp Health Care Int* 2011;9:41-9 doi:10.1891/1540-4153.9.1.41.

5 Rhee KE, De Lago CW, Arscott-Mills T, et al. Factors associated with parental readiness to  
make changes for overweight children. *Pediatrics* 2005;116:e94-e101.

6 da Silva DF, Bianchini JAA, Lopera CA, et al. Impact of readiness to change behavior on  
the effects of a multidisciplinary intervention in obese Brazilian children and adolescents.  
*Appetite* 2015;87:229-35 doi:10.1016/j.appet.2014.12.221.

7 Lau DCW, Douketis JD, Morrison KM, et al. 2006 Canadian clinical practice guidelines on  
the management and prevention of obesity in adults and children [summary]. *CMAJ*  
2007;176:S1-13 [doi:10.1503/cmaj.061409](https://doi.org/10.1503/cmaj.061409).

1  
2  
3 8 Krebs NF, Himes JH, Jacobson D, et al. Assessment of child and adolescent overweight and  
4 obesity. *Pediatrics* 2007;120:S193-228 [doi:10.1542/peds.2007-2329D](https://doi.org/10.1542/peds.2007-2329D).

7  
8 9 Daniels SR, Jacobson MS, McCrindle BW, et al. American Heart Association Childhood  
10 Obesity Research Summit: executive summary. *Circulation* 2009;119:2114-23  
11 [doi:10.1161/CIRCULATIONAHA.109.192215](https://doi.org/10.1161/CIRCULATIONAHA.109.192215).

12  
13 14 Gunnarsdottir T, Njardvik U, Olafsdottir AS, et al. The role of parental motivation in  
15 family-based treatment for childhood obesity. *Obesity* 2011;19:1654-62  
16 [doi:10.1038/oby.2011.59](https://doi.org/10.1038/oby.2011.59).

17  
18 19 Jones AR, Parkinson KR, Drewett RF, et al. Parental perceptions of weight status in  
20 children: the Gateshead Millenium Study. *Int J Obes* 2011;35:953-62.

21  
22 23 24 Park MH, Falconer CL, Croker H, et al. Predictors of health-related behaviour change in  
25 parents of overweight children in England. *Prev Med* 2014;62:20-4  
26 [doi:10.1016/j.ypmed.2014.02.002](https://doi.org/10.1016/j.ypmed.2014.02.002).

27  
28 29 30 Giannisi F, Pervanidou P, Michalaki E, et al. Parental readiness to implement life-style  
31 behaviour changes in relation to children's excess weight. *J Paediatr Child Health*  
32 2014;50:476-81 [doi:10.1111/jpc.12500](https://doi.org/10.1111/jpc.12500).

33  
34 35 36 37 Kelleher E, Davoren MP, Harrington JM, et al. Barriers and facilitators to initial and  
38 continued attendance at community-based lifestyle programmes among families of  
39 overweight and obese children: a systematic review. *Obes Rev* 2017;18:183-94  
40 [doi:10.1111/obr.12478](https://doi.org/10.1111/obr.12478).

41  
42 43 44 Teevale T, Taufa S, Percival T. Acceptability and non-compliance in a family-led weight-  
45 management programme for obese Pacific children. *Public Health Nutr* 2015;18:2625-33  
46 [doi:10.1017/S1368980014003255](https://doi.org/10.1017/S1368980014003255).

1  
2  
3 16 Rhee K, McEachern R, Jelalian E. Parent readiness to change differs for overweight child  
4 dietary and physical activity behaviors. *J Acad Nutr Diet* 2014;114:1601-10

5  
6  
7 [doi:10.1016/j.jand.2014.04.029](https://doi.org/10.1016/j.jand.2014.04.029).

8  
9  
10  
11 17 Anderson YC, Wynter LE, Moller KR, et al. The effect of a multi-disciplinary obesity  
12 intervention compared to usual practice in those ready to make lifestyle changes: design and  
13 rationale of Whanau Pakari. *BMC Obes* 2015;2:41. [doi:10.1186/s40608-015-0068-y](https://doi.org/10.1186/s40608-015-0068-y).

14  
15  
16  
17 18 Anderson YC, Taylor GM, Grant CC, et al. The Green Prescription Active Families  
18 programme in Taranaki, New Zealand 2007-2009 - did it reach children in need? *J Prim*  
19 *Health Care* 2015;7:192-7.

20  
21  
22  
23 19 Anderson YC, Wynter LE, Grant CC, et al. A novel home-based intervention for child and  
24 adolescent obesity: the results of Whānau Pakari randomised controlled trial. *Obesity*  
25 2017;25:1965-73. [doi:10.1002/oby.21967](https://doi.org/10.1002/oby.21967).

26  
27  
28  
29 20 Census 2013: Ethnic group by age group and sex. Available at:

30  
31  
32  
33 <http://nzdotstat.stats.govt.nz/wbos/Index.aspx?DataSetCode=TABLECODE8021#>. Accessed  
34 November/18, 2014.

35  
36  
37  
38 21 Cole TJ. A chart to link child centiles of body mass index, weight and height. *Eur J Clin*  
39 *Nutr* 2002;56:1194-9.

40  
41  
42  
43 22 Freeman JV, Cole TJ, Chinn S, et al. Cross sectional stature and weight reference curves  
44 for the UK, 1990. *Arch Dis Child* 1995;73:17-24.

45  
46  
47  
48 23 Hamlin MJ, Fraser M, Lizamore CA, et al. Measurement of cardiorespiratory fitness in  
49 children from two commonly used field tests after accounting for body fatness and maturity. *J*  
50 *Hum Kinet* 2014;40:83-92.

- 1  
2  
3 24 Varni JW, Burwinkle TM, Seid M, et al. The PedsQL 4.0 as a pediatric population health  
4 measure: feasibility, reliability, and validity. *Ambul Pediatr* 2003;3:329-41.  
5  
6  
7  
8  
9 25 Achenbach TM, Ruffle TM. The Child Behavior Checklist and related forms for assessing  
10 behavioral/emotional problems and competencies. *Pediatr Rev* 2000;21:265-71.  
11  
12  
13  
14 26 New Zealand Deprivation Index 2006. Available at: [https://koordinates.com/layer/1066-](https://koordinates.com/layer/1066-nz-deprivation-index-2006/)  
15 [nz-deprivation-index-2006/](https://koordinates.com/layer/1066-nz-deprivation-index-2006/) (accessed 02/12/17).  
16  
17  
18  
19 27 Kwapiszewski RM, Wallace AL. A pilot program to identify and reverse childhood  
20 obesity in a primary care clinic. *Clin Pediatr* 2011;50:630-5.  
21  
22  
23  
24 28 Wrotniak BH, Epstein LH, Paluch RA, et al. Parent weight change as a predictor of child  
25 weight change in family-based behavioral obesity treatment. *Arch Pediatr Adolesc Med*  
26 2004;158:342-7 [doi:10.1001/archpedi.158.4.342](https://doi.org/10.1001/archpedi.158.4.342).  
27  
28  
29 29 Robinson E, Sutin AR. Parents' perceptions of their children as overweight and children's  
30 weight concerns and weight gain. *Psychol Sci* 2017;28:320-9  
31 [doi:10.1177/0956797616682027](https://doi.org/10.1177/0956797616682027).  
32  
33  
34  
35 30 Ceccarini M, Borrello M, Pietrabissa G, et al. Assessing motivation and readiness to  
36 change for weight management and control: an in-depth evaluation of three sets of  
37 instruments. *Front Psychol* 2015;6:511 [doi:10.3389/fpsyg.2015.00511](https://doi.org/10.3389/fpsyg.2015.00511).  
38  
39  
40  
41 31 Andres A, Saldana C, Gomez-Benito J. Establishing the stages and processes of change for  
42 weight loss by consensus of experts. *Obesity* 2009;17:1717-23 [doi:10.1038/oby.2009.100](https://doi.org/10.1038/oby.2009.100).  
43  
44  
45  
46  
47  
48  
49  
50  
51  
52  
53  
54  
55  
56  
57  
58  
59  
60



## Supplementary Table 1

Changes at 12 months from baseline among children under 11 years of age, in association with the quantitative stage of change of caregiver at baseline (preparation/action vs pre-contemplation/contemplation).

|                                                                                | Preparation/<br>action | Pre-contemplation/<br>contemplation | Difference          | P-value <sup>‡</sup> |
|--------------------------------------------------------------------------------|------------------------|-------------------------------------|---------------------|----------------------|
| <b>n</b>                                                                       | 21                     | 18                                  |                     |                      |
| <b>Demographic characteristics</b>                                             |                        |                                     |                     |                      |
| Sex ratio (females)                                                            | 8 (38%)                | 7 (39%)                             |                     | 0.96                 |
| Ethnicity (New Zealand Europeans)                                              | 9 (43%)                | 5 (28%)                             |                     | 0.33                 |
| Deprivation index                                                              | 7 [5, 9]               | 5 [4, 10]                           |                     | 0.70                 |
| <b>Primary outcome</b>                                                         |                        |                                     |                     |                      |
| BMI SDS                                                                        | -0.19 (-0.32, -0.10)   | -0.17 (-0.31, -0.03)                | -0.02 (-0.19, 0.16) | 0.83                 |
| <b>Secondary outcomes</b>                                                      |                        |                                     |                     |                      |
| Waist circumference (cm)                                                       | 4.2 (1.9, 6.5)         | 2.8 (0.3, 5.3)                      | 1.4 (-2.2, 5.0)     | 0.43                 |
| Number of breakfasts eaten                                                     | -0.1 (-0.7, 0.5)       | 0.0 (-0.8, 0.7)                     | 0.0 (-0.1, 0.9)     | 0.90                 |
| Servings fruit/vegetables per day (n)                                          | 0.7 (0.1, 1.4)         | 1.4 (0.6, 2.1)                      | -0.6 (-1.6, 0.3)    | 0.17                 |
| Sweet drinks per day (ml)                                                      | -138 (-233, -42)       | -99 (-208, 11)                      | -39 (-178, 100)     | 0.57                 |
| 550-m walk/run time (minutes)                                                  | -0.3 (-0.6, -0.1)      | -0.4 (-0.8, -0.1)                   | 0.1 (-0.3, 0.5)     | 0.62                 |
| Actual steps per day (n)                                                       | 991 (-158, 2139)       | 223 (-922, 1369)                    | 767 (-966, 2501)    | 0.35                 |
| Actual moderate-intensity to very vigorous physical activity per day (minutes) | 4.2 (-3.1, 11.5)       | -9.7 (-17.0, -2.4)                  | 13.9 (2.7, 25.0)    | 0.02                 |
| Total reported activity per day (minutes)                                      | 17 (-23, 57)           | 18 (-29, 64)                        | 0 (-60, 59)         | 0.99                 |
| Reported screen time per day (minutes)                                         | -32 (-63, -1)          | -39 (-74, -4)                       | 7 (-39, 52)         | 0.77                 |
| Total generic scaled score – child                                             | 5.2 (-0.9, 11.3)       | 6.3 (-0.5, 13.2)                    | -1.1 (-10.0, 7.7)   | 0.80                 |
| Total generic scaled score – parent                                            | 7.7 (0.9, 14.6)        | 10.2 (2.5, 17.9)                    | -2.5 (-12.4, 7.5)   | 0.62                 |
| CBCL internalising raw score                                                   | -2.8 (-5.5, -0.2)      | -3.9 (-6.9, -0.9)                   | 1.0 (-2.8, 4.8)     | 0.58                 |
| CBCL externalising raw score                                                   | -3.6 (-7.0, -0.3)      | -2.1 (-5.9, 1.6)                    | -1.5 (-6.3, 3.4)    | 0.53                 |
| CBCL total raw score                                                           | -10.8 (-19.6, -2.1)    | -10.2 (-20.1, -0.2)                 | -0.7 (-13.4, 12.0)  | 0.92                 |
| HbA1c (mmol/mol)                                                               | 0.6 (-1.8, 3.0)        | 0.9 (-1.7, 3.6)                     | -0.3 (-3.7, 3.1)    | 0.85                 |
| Fasting insulin (pmol/L)                                                       | -23 (-54, 9)           | 40 (8, 72)                          | -62 (-107, -17)     | <0.01                |

Sex ratio and ethnicity data are n (%); deprivation index data are median [quartile 1, quartile 3]; all other data are means and 95% confidence intervals adjusted for child/adolescent's ethnicity, gender, level of deprivation, and the respective parameter at baseline.

<sup>‡</sup>P-value for a difference in change from baseline between pre-contemplation/contemplation and action groups.

Abbreviations: BMI SDS, body mass index standard deviation score; CBCL, Achenbach Child Behavior Checklist; HbA1c, glycated haemoglobin.

Supplementary Table 2

Changes at 12 months from baseline among children aged 11 years or older, in association with the quantitative stage of change of caregiver at baseline (preparation/action vs pre-contemplation/contemplation).

|                                                                                | Preparation/<br>action      | Pre-contemplation/<br>contemplation* | Difference                  | P-<br>value <sup>‡</sup> |
|--------------------------------------------------------------------------------|-----------------------------|--------------------------------------|-----------------------------|--------------------------|
| <b>n</b>                                                                       | 11                          | 18                                   |                             |                          |
| <b>Demographic characteristics</b>                                             |                             |                                      |                             |                          |
| Sex ratio (females)                                                            | 8 (42%)                     | 11 (58%)                             |                             | 0.52                     |
| Ethnicity (New Zealand Europeans)                                              | 4 (36%)                     | 10 (56%)                             |                             | 0.32                     |
| Deprivation index                                                              | 5 [2, 8]                    | 5 [3, 7]                             |                             | 0.96                     |
| <b>Primary outcome</b>                                                         |                             |                                      |                             |                          |
| BMI SDS                                                                        | -0.18 (-0.39, 0.04)         | 0.02 (-0.13, 0.18)                   | -0.20 (-0.47, 0.07)         | 0.14                     |
| <b>Secondary outcomes</b>                                                      |                             |                                      |                             |                          |
| Waist circumference (cm)                                                       | -1.92 (-5.16, 1.33)         | 1.15 (-1.24, 3.54)                   | -3.07 (-7.10, 0.97)         | 0.13                     |
| Number of breakfasts eaten                                                     | 0.64 (-0.86, 2.14)          | 0.55 (-0.54, 1.64)                   | 0.04 (-1.73, 1.89)          | 0.92                     |
| Servings fruit/vegetables per day (n)                                          | 1.10 (-0.30, 2.49)          | 1.19 (0.19, 2.19)                    | -0.09 (-1.76, 1.57)         | 0.91                     |
| Sweet drinks per day (ml)                                                      | -253.89 (-334.49, -173.27)  | -160.07 (-219.60, -100.55)           | -93.80 (-191.81, 4.20)      | 0.06                     |
| 550-m walk/run time (minutes)                                                  | -0.69 (-0.99, -0.39)        | -0.71 (-0.95, -0.46)                 | 0.02 (-0.37, 0.41)          | 0.92                     |
| Actual steps per day (n)                                                       | -403.25 (-2987.79, 2181.29) | -1758.26 (-4225.62, 709.10)          | 1355.01 (-2137.89, 4847.92) | 0.40                     |
| Actual moderate-intensity to very vigorous physical activity per day (minutes) | 10.72 (-15.40, 36.83)       | -16.15 (-43.23, 10.93)               | 26.87 (-10.54, 64.28)       | 0.14                     |
| Total reported activity per day (minutes)                                      | 43.21 (2.65, 83.78)         | 25.57 (-3.88, 55.03)                 | 17.64 (-33.30, 68.58)       | 0.48                     |
| Reported screen time per day (minutes)                                         | -1.94 (-89.76, 85.87)       | 21.69 (-42.08, 85.46)                | -23.63 (-134.51, 87.24)     | 0.66                     |
| Total generic scaled score – child                                             | 3.78 (3.35, 19.06)          | 6.37 (0.69, 12.05)                   | 4.83 (-5.02, 14.68)         | 0.32                     |
| Total generic scaled score – parent                                            | 13.68 (1.17, 26.19)         | 2.84 (-6.36, 12.05)                  | 10.84 (-5.17, 26.84)        | 0.17                     |
| CBCL internalising raw score                                                   | -4.53 (-9.58, 0.52)         | -3.62 (-7.24, 0.00)                  | -0.91 (-7.31, 5.49)         | 0.77                     |
| CBCL externalising raw score                                                   | -3.12 (-7.04, 0.81)         | -1.56 (-4.37, 1.27)                  | -1.57 (-6.46, 3.32)         | 0.51                     |
| CBCL total raw score                                                           | -15.10 (-27.05, -3.15)      | -7.58 (-16.26, 1.09)                 | -7.51 (-22.51, 7.49)        | 0.31                     |
| HbA1c (mmol/mol)                                                               |                             |                                      |                             |                          |
| Fasting insulin (pmol/L)                                                       | 20.86 (-32.98, 74.70)       | -25.84 (-76.39, 24.70)               | 46.70 (-27.08, 120.49)      | 0.20                     |

Anderson YC, Dolan G, Wynter L, Treves K, Wouldes T, Grant CC, Cave TL, Smiley AE, Derraik JGB, Cutfield WSC, Hofman PL. Caregiver's readiness for change as a predictor of outcome and attendance in an intervention programme for children and adolescents with obesity: a secondary data analysis. BMJ Open.

For peer review only - <http://bmjopen.bmj.com/site/about/guidelines.xhtml>

1  
2  
3  
4 Sex ratio and ethnicity data are n (%); deprivation index data are median [quartile 1, quartile 3]; all other data are means and  
5 95% confidence intervals adjusted for child/adolescent's ethnicity, gender, level of deprivation, and the respective parameter at  
6 baseline.

7  
8 ‡P-value for a difference in change from baseline between pre-contemplation/contemplation and action groups.

9 Abbreviations: BMI SDS, body mass index standard deviation score; CBCL, Achenbach Child Behavior Checklist; HbA1c,  
10 glycated haemoglobin.  
11  
12  
13  
14  
15  
16  
17  
18  
19  
20  
21  
22  
23  
24  
25  
26  
27  
28  
29  
30  
31  
32  
33  
34  
35  
36  
37  
38  
39  
40  
41  
42  
43  
44  
45  
46  
47  
48  
49  
50  
51  
52  
53  
54  
55  
56  
57  
58  
59  
60

For peer review only

## STROBE Statement—checklist of items that should be included in reports of observational studies

|                              | Item No | Recommendation                                                                                                                                                                                                                                                                                                                                                                                                                                                         | Complete?  |
|------------------------------|---------|------------------------------------------------------------------------------------------------------------------------------------------------------------------------------------------------------------------------------------------------------------------------------------------------------------------------------------------------------------------------------------------------------------------------------------------------------------------------|------------|
| <b>Title and abstract</b>    | 1       | (a) Indicate the study's design with a commonly used term in the title or the abstract                                                                                                                                                                                                                                                                                                                                                                                 | ✓ (1, 3-4) |
|                              |         | (b) Provide in the abstract an informative and balanced summary of what was done and what was found                                                                                                                                                                                                                                                                                                                                                                    | ✓ (3-4)    |
| <b>Introduction</b>          |         |                                                                                                                                                                                                                                                                                                                                                                                                                                                                        |            |
| Background/rationale         | 2       | Explain the scientific background and rationale for the investigation being reported                                                                                                                                                                                                                                                                                                                                                                                   | ✓ (5-7)    |
| Objectives                   | 3       | State specific objectives, including any prespecified hypotheses                                                                                                                                                                                                                                                                                                                                                                                                       | ✓ (8-9)    |
| <b>Methods</b>               |         |                                                                                                                                                                                                                                                                                                                                                                                                                                                                        |            |
| Study design                 | 4       | Present key elements of study design early in the paper                                                                                                                                                                                                                                                                                                                                                                                                                | ✓ (9-12)   |
| Setting                      | 5       | Describe the setting, locations, and relevant dates, including periods of recruitment, exposure, follow-up, and data collection                                                                                                                                                                                                                                                                                                                                        | ✓ (9-11)   |
| Participants                 | 6       | (a) <i>Cohort study</i> —Give the eligibility criteria, and the sources and methods of selection of participants. Describe methods of follow-up<br><i>Case-control study</i> —Give the eligibility criteria, and the sources and methods of case ascertainment and control selection. Give the rationale for the choice of cases and controls<br><i>Cross-sectional study</i> —Give the eligibility criteria, and the sources and methods of selection of participants | ✓ (9)      |
|                              |         | (b) <i>Cohort study</i> —For matched studies, give matching criteria and number of exposed and unexposed<br><i>Case-control study</i> —For matched studies, give matching criteria and the number of controls per case                                                                                                                                                                                                                                                 | N/A        |
| Variables                    | 7       | Clearly define all outcomes, exposures, predictors, potential confounders, and effect modifiers. Give diagnostic criteria, if applicable                                                                                                                                                                                                                                                                                                                               | ✓ (12-13)  |
| Data sources/<br>measurement | 8*      | For each variable of interest, give sources of data and details of methods of assessment (measurement). Describe comparability of assessment methods if there is more than one group                                                                                                                                                                                                                                                                                   | ✓ (9-11)   |
| Bias                         | 9       | Describe any efforts to address potential sources of bias                                                                                                                                                                                                                                                                                                                                                                                                              | ✓ (13)     |
| Study size                   | 10      | Explain how the study size was arrived at                                                                                                                                                                                                                                                                                                                                                                                                                              | ✓ (9)      |
| Quantitative variables       | 11      | Explain how quantitative variables were handled in the analyses. If applicable, describe which groupings were chosen and why                                                                                                                                                                                                                                                                                                                                           | ✓ (12-14)  |
| Statistical methods          | 12      | (a) Describe all statistical methods, including those used to control for confounding                                                                                                                                                                                                                                                                                                                                                                                  | ✓ (12-14)  |
|                              |         | (b) Describe any methods used to examine subgroups and interactions                                                                                                                                                                                                                                                                                                                                                                                                    | ✓ (12-14)  |
|                              |         | (c) Explain how missing data were addressed                                                                                                                                                                                                                                                                                                                                                                                                                            | (13)       |
|                              |         | (d) <i>Cohort study</i> —If applicable, explain how loss to follow-up was addressed<br><i>Case-control study</i> —If applicable, explain how matching of cases and controls was addressed<br><i>Cross-sectional study</i> —If applicable, describe analytical methods taking account of sampling strategy                                                                                                                                                              | N/A        |
|                              |         | (e) Describe any sensitivity analyses                                                                                                                                                                                                                                                                                                                                                                                                                                  | N/A        |

Continued on next page

1

2

3

4

5

6

7

8

9

10

11

12

13

14

15

16

17

18

19

20

21

22

23

24

25

26

27

28

29

30

31

32

33

34

35

36

37

38

39

40

41

42

43

44

45

46

47

48

49

50

51

52

53

54

55

56

57

58

59

60

| <b>Results</b>           |     |                                                                                                                                                                                                              |           |
|--------------------------|-----|--------------------------------------------------------------------------------------------------------------------------------------------------------------------------------------------------------------|-----------|
| Participants             | 13* | (a) Report numbers of individuals at each stage of study—eg numbers potentially eligible, examined for eligibility, confirmed eligible, included in the study, completing follow-up, and analysed            | ✓ (14–15) |
|                          |     | (b) Give reasons for non-participation at each stage                                                                                                                                                         | ✓ (14–15) |
|                          |     | (c) Consider use of a flow diagram                                                                                                                                                                           | N/A       |
| Descriptive data         | 14* | (a) Give characteristics of study participants (eg demographic, clinical, social) and information on exposures and potential confounders                                                                     | ✓ (14–15) |
|                          |     | (b) Indicate number of participants with missing data for each variable of interest                                                                                                                          | ✓ (15)    |
|                          |     | (c) <i>Cohort study</i> —Summarise follow-up time (eg, average and total amount)                                                                                                                             | N/A       |
| Outcome data             | 15* | <i>Cohort study</i> —Report numbers of outcome events or summary measures over time                                                                                                                          | ✓ (15–18) |
|                          |     | <i>Case-control study</i> —Report numbers in each exposure category, or summary measures of exposure                                                                                                         | N/A       |
|                          |     | <i>Cross-sectional study</i> —Report numbers of outcome events or summary measures                                                                                                                           | N/A       |
| Main results             | 16  | (a) Give unadjusted estimates and, if applicable, confounder-adjusted estimates and their precision (eg, 95% confidence interval). Make clear which confounders were adjusted for and why they were included | ✓ (15–18) |
|                          |     | (b) Report category boundaries when continuous variables were categorized                                                                                                                                    | N/A       |
|                          |     | (c) If relevant, consider translating estimates of relative risk into absolute risk for a meaningful time period                                                                                             | N/A       |
| Other analyses           | 17  | Report other analyses done—eg analyses of subgroups and interactions, and sensitivity analyses                                                                                                               | ✓ (15–18) |
| <b>Discussion</b>        |     |                                                                                                                                                                                                              |           |
| Key results              | 18  | Summarise key results with reference to study objectives                                                                                                                                                     | ✓ (18–19) |
| Limitations              | 19  | Discuss limitations of the study, taking into account sources of potential bias or imprecision. Discuss both direction and magnitude of any potential bias                                                   | ✓ (20–21) |
| Interpretation           | 20  | Give a cautious overall interpretation of results considering objectives, limitations, multiplicity of analyses, results from similar studies, and other relevant evidence                                   | ✓ (21)    |
| Generalisability         | 21  | Discuss the generalisability (external validity) of the study results                                                                                                                                        | ✓ (18–21) |
| <b>Other information</b> |     |                                                                                                                                                                                                              |           |
| Funding                  | 22  | Give the source of funding and the role of the funders for the present study and, if applicable, for the original study on which the present article is based                                                | ✓ (22)    |

\*Give information separately for cases and controls in case-control studies and, if applicable, for exposed and unexposed groups in cohort and cross-sectional studies.

**Note:** An Explanation and Elaboration article discusses each checklist item and gives methodological background and published examples of transparent reporting. The STROBE checklist is best used in conjunction with this article (freely available on the Web sites of PLoS Medicine at <http://www.plosmedicine.org/>, Annals of Internal Medicine at <http://www.annals.org/>, and Epidemiology at <http://www.epidem.com/>). Information on the STROBE Initiative is available at [www.strobe-statement.org](http://www.strobe-statement.org).
